# Supplementary material
Source: PubMed Central journal article supplement (PMC520948)
Supplement: plntcell_tpc.104.022715_1.pdf [file plntcell_tpc.104.022715_1.pdf]

**Supplemental Figure 1.** Alignment of protein sequences from the  $\beta$ -ketoacyl synthase (KS) and acyltransferase (AT) domains of fungal PKS and PKS/NRPS. Protein sequences were aligned using AlignX. A similar alignment was obtained with ClustalW. The active sites of the KS and AT domains are indicated by green lines above the alignment. The following sequences were included in this analysis (see Methods for accession numbers): *M. grisea* (Ace1, Syn2, Syn6,7,8, mg03810, mg03818, mg09589); *A. fumigatus* (af04917); *A. nidulans* (AN8412, AnpksST, AnWA); *F. graminearum* (FG10464); *N. crassa* (ncu08399, ncu09638, ncu02918); *A. terreus* (LNKS, LDKS, AtMSAS, Atat1); *P. griseofulvum* (PgPKS2), *C. heterostrophus* (ChPKS1,2,16,17); *G. moniliformis* (FUM1, GmPKS1,9,10), *C. lagenarium* (CIPKS1) and, *B. fuckeliana* (BfPKS3,4,5,6,8). Bacterial PKS sequences (epoD, MxaC, MxaD) were included as references.

|           |     | 1     |   | 50 |
|-----------|-----|-------|---|----|
| ACE1      | (1) | EPIAI | I | GS |
| Syn7      | (1) | EPIAI | I | GS |
| Syn6      | (1) | EPIA  | V | VG |
| LNKS      | (1) | EPIV  | V | VG |
| GmPKS9    | (1) | EPIA  | V | VG |
| GmPKS1    | (1) | EPIAI | I | GS |
| BfPKS5    | (1) | EPIAI | I | GM |
| ChPKS16   | (1) | EPIA  | I | VG |
| FG10464   | (1) | EPIAI | I | GT |
| mg03818   | (1) | EPIA  | V | IG |
| Syn2      | (1) | EPIAI | I | GT |
| mg03810   | (1) | EPIA  | I | VG |
| ChPKS17   | (1) | EPIA  | V | VG |
| GmPKS10   | (1) | EPIAI | I | GT |
| af04917   | (1) | EPIAI | I | GT |
| ncu08399  | (1) | EPIA  | I | VG |
| BfPKS6    | (1) | EPIA  | V | IG |
| BfPKS3    | (1) | KPVA  | I | IG |
| BfPKS4    | (1) | EPIAI | I | GR |
| AN8412    | (1) | DLIA  | I | VG |
| mg09589   | (1) | EPIA  | V | IG |
| Syn8      | (1) | EPVA  | I | IG |
| ChPKS2    | (1) | MPLA  | I | IG |
| ChPKS1    | (1) | -PIA  | I | VG |
| BfPKS8    | (1) | IPIA  | I | VG |
| LDKS      | (1) | APIA  | I | VG |
| ncu04865  | (1) | MPIA  | I | IG |
| FUM1      | (1) | LPVA  | I | VG |
| ncu09638  | (1) | STDV  | G | V  |
| ncu02918  | (1) | EPIAI | I | GM |
| AtMSAS    | (1) | NEVA  | V | GM |
| PgPKS2    | (1) | DDIA  | I | IG |
| EpoD      | (1) | EPIA  | I | VG |
| MxaC      | (1) | EPIA  | I | VG |
| MxaD      | (1) | EPIA  | I | VG |
| pks ST    | (1) | GKLA  | I | VG |
| AnWA      | (1) | SKIA  | I | IG |
| C1PKS1    | (1) | CKLA  | I | VG |
| Atat1     | (1) | QKIA  | I | VG |
| Consensus | (1) | EPIA  | I | VG |

ACE1 (45) KYFHPDHKHHG-TSNVRHSYFLE---ENFKHFDAKFFGIRPQEAMAMDPQ  
 Syn7 (45) AFHHADGSHHG-RTNARHG YFLN---NVKTFDAQFFGVQAGEAESMDPQ  
 Syn6 (45) SFYHPDGSFHG-RTNAANAYFLD---QNIRAF DANFFNIQHHEAEVTD P Q  
 LNKS (45) TFYHPDGKHHG-RTNAPYAYVLQ---DDLGAFDAAFFNIQAGEAESMDPQ  
 GmPKS9 (45) SFYHSDPTHHG-TTNVTQSYFLD---EDVTKFDNGFFGIQPM EAEAMDPQ  
 GmPKS1 (45) AFYHADSKHHG-TTNVRHSYFLN---EDPARFDNNFFNIQPG EAEAI DPQ  
 BfPKS5 (45) AFFHTNGSYHG-ATDSREAYFLE---EDVALFDNAFFNIQPG EAEAVDPQ  
 ChPKS16 (45) GFYHPDGSHHG-HMNVLQSYLLE---EDTRLFDAEFFGINPVEAKAMDPQ  
 FG10464 (45) RFYHKDSSHHG-TANVRRSYLLD---EDVRLFDTQFFGISPG EAQAMDPQ  
 mg03818 (44) GFYHPNAQHHA-STNVRKSYFLD---VNVRFKFDHNFFNITAVEAAAMDPQ  
 Syn2 (45) GFYHPKNSHHG-TSNVRHSYLLD---EDLRTYDAQFFGVKAI EASSMDPQ  
 mg03810 (45) GFYHQDGEYGG-HSNVRDSYTTA---EDVAAWDAGFFNVAAA EASAI DPQ  
 ChPKS17 (45) AFYNEDGSKPG-CTNVNHGYFLD---EDIRAFDAAFFRMNPAEVEAVDPQ  
 GmPKS10 (45) AFYSSNGDKNG-CTDVKKAYLLA---EDIRLFDASFFKINPREAEAMDPQ  
 af04917 (46) GFYNV DGEHHG-ASNATNAYFLE---EDPRYFDAGFFSIAPREAE SIDPQ  
 ncu08399 (45) GFYHPDGEYHG-TTNSAKAYFLE---QDHR LFDASFFNITPK EAEAI DPQ  
 BfPKS6 (45) AFYHPNGEHHG-TTNATKSYFLN---EDPTTFDAPFFNINPREAEALDPQ  
 BfPKS3 (44) GFYHQDQGHG-TSNVLHSYLLD---ENPLAFD SAFFHIHNREAE CIDPQ  
 BfPKS4 (45) -----R---HSTSTRGYFLS---QDVREFDASFFSLSPLEAQAMDPQ  
 AN8412 (45) RFYHPDGEHHGSTDVRGTSYLLS---EDPRQFDASFFNINPREAE GMDPQ  
 mg09589 (50) KFYHPDGRHG-RTPVGKAYFLSEDL-DPALFDASFFGISPLEAEAMDPQ  
 Syn8 (45) KFHHAKGEHHG-SSNVLKS YFL---DQ-DPCLFDGSFFGISPLEAEAMDPQ  
 ChPKS2 (45) AFYHPNQSRKD-CIDVNCGYFLD---GDLAEFDAQFFKMNG---TDADPQ  
 ChPKS1 (44) GFYHPDSSRHG-THNVEYGHWFQ---QDVYNFDAPFFNVSPA EAAALDPQ  
 BfPKS8 (45) SFYHPNPGKAG-CFNAAGGNFLK---EDVGLFDAPFFSLTAQEATSMDPQ  
 LDKS (45) GYHPNQVRVG-SMVRGGHFLD---EDPALFDASFFNMSTEVA SCMDPQ  
 ncu04865 (45) GFHHPNFEKLN-GTNVIGGHFMK---EDVGLFDAHFFNLSAETAAALDPQ  
 FUM1 (45) GFHSPSSK-PG-SIAMRHGHFLDDK-DDLHRLDTSFFSMGMT EVSDIDPQ  
 ncu09638 (45) GFHHPNSDRPG-SMSMKGAFLAEQ---DARLFDHTFFGMTGLEVETMDPS  
 ncu02918 (45) GFYHPNSDRPG-SLNMEGGYFIED---DIRGFENSFFGINNLEATYMDPQ  
 AtMSAS (45) YRRDIRNP-KILDQTTKRGYFLD---HVENFDAAFFGVSPKEAEQMDPQ  
 PgPKS2 (45) RQRHPRNA-AALAKTTAKGYFVN---DIDHFDAAFFAISPREAEQMDPQ  
 EpoD (44) GVAPVEAVP-----HWAGLLTEP---IDCFDAAFFGISPREARSLDPQ  
 MxaC (44) EVADIGDG-----AMRWGGFLDS---VDSFDPGFFGISPREAVRMDPQ  
 MxaD (45) ALFDDDPNKQG-RTYARWGGFLDG---VDRFDAAFFGVSPREASRMDPQ  
 pks ST (44) THVDPSGKARN-KGATRWGCWLD---FAGEFDPRFFSISPKEAPQMDPA  
 AnWA (44) AHVDLTGTATN-TSKVPYGCWIR---EPGLFDPRFFNMSPREALQADPA  
 ClPKS1 (44) THYDITGKAVN-TSHSQYGCWIE---NPGYFDPRFFNMSPREAFQTDPM  
 Atat1 (44) AHYDPTGK KLN-STHTPYGCFL E---KPGLFDPRFFNMSQREAYQTDPM  
 Consensus (51) GFYHP G G TNV GYFLD DV FDA FF ISP EA AMDPQ

|           | 101   |                                                      | 150                      |
|-----------|-------|------------------------------------------------------|--------------------------|
| ACE1      | (91)  | QRFLLETVYESLEAAGITISDLKGS---                         | QAGVFGVNMGVVDSYSELLSQDI- |
| Syn7      | (90)  | QRQLLEATYDALCAAGOTLGALKGS---                         | DTAVYVGIIMTHDFELTKVGD-   |
| Syn6      | (91)  | HRLLLETVYEALATAGLRVEDLRGS---                         | STAVYCGQMMNDYKDLVNFQ-    |
| LNKS      | (91)  | HRLLLETVYEAATNAGMRIQDLQGT---                         | STAVYVGVIMTHDYETVSTRDL-  |
| GmPKS9    | (91)  | QRLLLETVYDSVVDAGLAMEDLKGS---                         | DTSVFVGQMCDDWAQMLAKDW-   |
| GmPKS1    | (91)  | QRLLMEVVYQGLCASGQTIEGLRGS---                         | PTAVYVGVMCDDWSGIITRDL-   |
| BfPKS5    | (91)  | QRLLMETVYDSLCAAGQTIEGLRGS---                         | NTGLYVGMMSDDWAQAINRDW-   |
| ChPKS16   | (91)  | QRLLLEVVEASTESAGLSIDRLRGS---                         | DTAVFAGLMCGDYEARMLRDL-   |
| FG10464   | (91)  | HRVLLLEVVEALETESAGKTIHGLHNS---                       | DTAVNA-----              |
| mg03818   | (90)  | QRLLLETVYEALENASVSDKQLKGS---                         | DTGVYVGLMCGDYENILMRDI-   |
| Syn2      | (90)  | QRLLMETVYEALESAGLSIKQLQGS---                         | DTAVYVGVMSADFMMLARDV-    |
| mg03810   | (91)  | QRLLTECVYEALESAGHSVQALRGS---                         | DTAVYVGLVNEEYSDIHYREL-   |
| ChPKS17   | (91)  | QRMLLETVFEALESAGTTIDQLQGT---                         | DTAVYVGCMTSDYVEMLLRDP-   |
| GmPKS10   | (91)  | QRLLLEAVYEAFETAGLPMEDLKGS---                         | DTAVYVGCMTGDYHEMLMRDP-   |
| af04917   | (92)  | QRLLLETVYEAAMENAGLTLNGLRGS---                        | ATSAYMGAMSADYTDQLRDI-    |
| ncu08399  | (91)  | QRMLLEVVEEALESAGYTLQDYSYSGK---                       | KVAVFAGVMTADYDTLSQRDD-   |
| BfPKS6    | (91)  | QRLLLETVYEALESAGLSIEEMQGT---                         | STAVYVGLMCADYFDVLMRDI-   |
| BfPKS3    | (90)  | QRLLLENVYETTESACYPMETLRGS---                         | DTGVFVGLMCADYDVQMRDP-    |
| BfPKS4    | (81)  | HRLLLETVYEALESAGLPAETLRGS---                         | DTAVYVGVMFHDYLSLSSQDH-   |
| AN8412    | (92)  | QRLLLETAFEALESAGYSLEAMNGS---                         | KTSVHVGVMNSDFSNQLRDP-    |
| mg09589   | (98)  | QRMLLETVYEAASESAGMPLDKLAAA---                        | NCAVYVGMATADYAEIPTRDV-   |
| Syn8      | (91)  | QRLLLETVYEAASESAGATLEGLRGS---                        | RTSVHVGVMTGADYADVQARDA-  |
| ChPKS2    | (88)  | GRMLLECVYEALENAGGSQESIVGS---                         | KVGVFSTSNSTSDYTLSLKDDI-  |
| ChPKS1    | (90)  | QRMLLECSYEAFFENSCTPMSKIVGT---                        | DTSVFVSSFATDYTDMLWRDP-   |
| BfPKS8    | (91)  | QRILLECTFEALESAGLIPKHEIVGK---                        | DVGVFVGSFSEYESASFVDT-    |
| LDKS      | (91)  | YRLILEVVEEALESAGLPLEQVSGS---                         | KTGVFAGTMYHDYQGSFQRQP-   |
| ncu04865  | (91)  | FRLLQLESTYEALESAGITLQDVAGS---                        | NTSVYAGSFVFRDYHESLI RDP- |
| FUM1      | (92)  | QRMLLEVAYECMQSSGQTNWRGS---                           | NIGCYVGVWGEDWLDLHSKDL-   |
| ncu09638  | (91)  | QRKLLLEVAYEALETESAGETWESVSGT---                      | RTGVFVGNFCLDHWMIQSRDW-   |
| ncu02918  | (91)  | QRKLLLEVVFETFENAGFTLDQVSDA---                        | NIGCYVGNFVTFDITMQLKDS-   |
| AtMSAS    | (90)  | QRLSLEVTWEALEDAGLPPQSLSGS---                         | ETAVFMGVNSDDYSKLLLEDI-   |
| PgPKS2    | (90)  | QRIALEVVAWEALENAGLSPSRLAGS---                        | DTSVYMGVNSDDYGKLVLEDL-   |
| EpoD      | (84)  | HRLLLEVVAWEGLEDAGLPPRSIDGS---                        | RTGVFVGAFTADYARTVARLPR   |
| MxaC      | (84)  | QRLLLEVVAWEALEDAGLDVVKLSGS---                        | RSGVFIGACNDDYHCMQVERP-   |
| MxaD      | (90)  | QRMLLEVVAWEALERAGQPPDQLAGS---                        | RTGVFLGIIGSDYAQLQARLLG   |
| pks ST    | (89)  | QRMALMSTYEAAMERGLVDPDTPSTQNRNIGVHGVTSNDWMETNTA---    |                          |
| AnWA      | (89)  | QRLLALLTAYEALEGAGFVPDSTPSTQRDRVGLFYGMTSDDYREVNSG---  |                          |
| ClPKS1    | (89)  | QRMALTTAYEALEMCGYVPNRTPSTRLDRICTFYGQTSDDWREINAA---   |                          |
| Atat1     | (89)  | GRLLALVTAYEALEMSTGFVPNRTPSSMLDRIGTFYGQTSDDWRTLNAA--- |                          |
| Consensus | (101) | QRLLLE VYEAELESAGITIE L GS                           | TGVFVGV M DY L RD        |

## KS active site

|           | 151                                                        | 200                           |
|-----------|------------------------------------------------------------|-------------------------------|
| ACE1      | (137) DAFPTTYFAPGTAARSILSN---RISYFFDLHG                    | PSVTVDTACSSSLVAVHQA           |
| Syn7      | (136) DAIPTYLATGAATSIASN---RISYFFDWHGPSN-----              |                               |
| Syn6      | (137) DRLPTYTATGTAASILSN---RVSYFFDWHGPSMTIDTACSSSLVAVHHA   |                               |
| LNKS      | (137) ESIPTYSATGVAVSVASN---RISYFFDWHGPSMTIDTACSSSLVAVHHA   |                               |
| GmPKS9    | (137) DDIPTYMGTVGSRVMSN---RVSYFFDWHGPSMSIDTACSSSLVAVHEA    |                               |
| GmPKS1    | (137) EVFPQYGATGMARSIMSN---RISYFFDWHGPSMTIDTACSSSLVAVHQA   |                               |
| BfPKS5    | (137) ESTMTYAAATGQSRRAIVSN---RISYFFDWHGPSMTVDTACSSSLVAVHQA |                               |
| ChPKS16   | (137) DQVPTHFATGTSRAVMSN---RVSYFFDWHGPSVTVDTACSSSLVAVHHA   |                               |
| FG10464   | (122) -----S-----S---RVSYFFNWHGPSMTIDTACSSSLVAVHEA         |                               |
| mg03818   | (136) DCAPRYQATGVGRSISMAN---RISYTWDLHG                     | PSMTIDTACSSSLVALHQA           |
| Syn2      | (137) EKFPPTYFATGTAARSILSN---RISYFYDWHGPSMTIDTACSSSLIALHQA |                               |
| mg03810   | (137) NNTTPRYFSTGTRSIASN---RISYIFDWRGASMTIDTACSSSLVALHQA   |                               |
| ChPKS17   | (137) LDFPKYMAPGTAARSILSN---RISYFYDWHGPSMTIDTACSSSLVAVHEA  |                               |
| GmPKS10   | (137) QDMPKYMATGTAARSILSN---RISYLFDWKGPSMTIDTACSSSLVAVYDA  |                               |
| af04917   | (138) ENVSKYMITGTSRALLAN---RISYFFDWKGPSISVDTACSSSLAAVHLG   |                               |
| ncu08399  | (137) LSVSQYYATGNARSIISN---RVSYFFNFHGPSMTIDTACSSSLVALHQA   |                               |
| BfPKS6    | (137) EDIPQYLATGTAARSIMSN---RISYFFDWKGPSMTIDTACSSSLVAVHNA  |                               |
| BfPKS3    | (136) ETLPQYFSTGTARSIVSN---RVSYFFDWKGPSLTIDTACSSSLVAVHQA   |                               |
| BfPKS4    | (127) MAIPKYHITGTAPNKASN---RISYFFDWHGPSVTVDTACSSSLVALDHA   |                               |
| AN8412    | (138) EVLPTYNATGTAISILSN---RISYFFNLKGPSVTVDTACSSSLVALHQA   |                               |
| mg09589   | (144) EDVSTYMASGTSRAVLAN---RISHFFDLRGPSVCLDTACSSSLVALHLA   |                               |
| Syn8      | (137) EDLSSYFASGTSRAMLAN---RVSYALDLRGPSVCIDTACSSSLVALHQA   |                               |
| ChPKS2    | (134) YSMPALVGVLATACMLS---NIVSNTFDLKGPSVSDTACSSAFYALQLA    |                               |
| ChPKS1    | (136) ESVPMYQCTNSGFSRSNLANRISYFDFLKGPSVLVDTACSSGGLTALHLA   |                               |
| BfPKS8    | (137) DSVPMYQATGKLFFLS---NRISHFFDLRGPSFTMDTACSSSLVALHQA    |                               |
| LDKS      | (137) EALPRYFITGNAGTMLA---NRVSHFYDLRGPSVSDTACSTTLTALHLA    |                               |
| ncu04865  | (137) DTLPRFLLMGTGAAMAS---NRLSHFFDLRGPSMSVDTGCSTTLTALHQA   |                               |
| FUM1      | (136) YDSGTYRVSGGHDFALSN---RISYEYDLKGPSFTIKAGCSSSLIALHEA   |                               |
| ncu09638  | (137) DNPRPYAFTGAGTSILAN---RISYIFNLQGPSLTVDTACSSSMYALHLA   |                               |
| ncu02918  | (137) EYTHRYSATGLGTILAN---RISHVFNMKGPSFVIDTACSSSLYCLHAA    |                               |
| AtMSAS    | (136) PNVEAWMGIPTAYCGVFN---RISYHLNLMGPSTAVDAACASSLVAIHGG   |                               |
| PgPKS2    | (136) TGVGAHMGVGTAYCGIPS---RISYLLDLMGPSVALDAACASSLVAVHHA   |                               |
| EpoD      | (131) EERDAYSATGNMLSIAAG---RISYTLGLQGPCLTVDTACSSSLVAIHHLA  |                               |
| MxaC      | (130) ETGDAFSAATGVAASVLSG---RISYLFNLQGPSLVVDTACSSSLVSLHLA  |                               |
| MxaD      | (137) DSPDIYHLTGTSLNAAAG---RISYTLGLQGPCMSIDTACSSSLVALHVA   |                               |
| pks ST    | (136) QNIDTYFITGGRGFIIPG---RINFCEFFSGPSYSNDTACSSSLAAIHHLA  |                               |
| AnWA      | (136) QDIDTYFIPGGNRAFTPG---RINYFKFSGPSVSDTACSSSLAAIHHLA    |                               |
| ClPKS1    | (136) QEVDTYITGVRAFPGP---RINYHFKFSGPSLNVDTACSSSAAALNVA     |                               |
| Atat1     | (136) EKIDMYIIPGTIRAFATS---RINYHFKFKGPSYNVDTACSSSFAATQLA   |                               |
| Consensus | (151) E VP Y ATG ARSILSN                                   | RISYFFDW GPSMTIDTACSSSLVALH A |

|           | 201                                                      | 250 |
|-----------|----------------------------------------------------------|-----|
| ACE1      | (184) VQSLRLG---ETPVAVVCGANLLGPAQYIAESKLOMLS-----PNG     |     |
| Syn7      | (167) -----FITESKLSMLS-----PTG                           |     |
| Syn6      | (184) VQQLRSG---SSKVATAAGANLILGVPPLIVESKMNMLS-----PTG    |     |
| LNKS      | (184) VQQLRTG---QSSMAIAAGANLILGPMTFVLESKLSMLS-----PSG    |     |
| GmPKS9    | (184) VRTLRSV---ESNVAVVAAAGANLILGPMYIACESKLRMTS-----PTG  |     |
| GmPKS1    | (184) IQTLRSV---ESEVATAAGANLILTPGMYIAESKLSMLS-----PSG    |     |
| BfPKS5    | (184) VTSLRNG---ECPVVIAAGVNLLGPGMWIAESKLSHMLS-----PTG    |     |
| ChPKS16   | (184) VQALRSG---DSHAAVACGSNLIFGPEMYVIESKLSMLS-----PDS    |     |
| FG10464   | (153) VQALRNG---TSRMAVACGTNLILSPLPFISESNLSMLS-----PTG    |     |
| mg03818   | (183) VQALRLG---ESRLAIVGGSNLLG-----PEW                   |     |
| Syn2      | (184) VQVLRSK---QSKVAVAAGSNILGPEQYIAESKLOMLS-----PDG     |     |
| mg03810   | (184) VQTLRSV---AFKVAVVAAAGVNMLLGPPEPYIVESSFHMLS-----PTG |     |
| ChPKS17   | (184) VQALRSG---ISRVACAAGSNAILGPENFVIESKLSMLS-----PTG    |     |
| GmPKS10   | (184) VTALRNG---VSRVACAGVNLLGPEMMISESKLSHMLS-----PTG     |     |
| af04917   | (185) FQALRAG---ECTISCVGGSNIIINPDCYLAATSLHLLS-----PTG    |     |
| ncu08399  | (184) VLSLRSG---EAEMACVSGVNLLITPEQFVIVESSLHMLS-----PTG   |     |
| BfPKS6    | (184) ISTRLSV---QSRTAIAAGANLIFGPEMYIGESNLHMLS-----PTG    |     |
| BfPKS3    | (183) VVALRNG---ECRSVAVVAGVNLLGPEMFNGEANLKMMLS-----PTG   |     |
| BfPKS4    | (174) VQQLRSG---SSTLAVVAAAGANLLDGRPFIFGNMGMMLS-----PTG   |     |
| AN8412    | (185) VQQLRAG---DATAIVVAGANLIFDPAMYIAESSLHMLS-----PDS    |     |
| mg09589   | (191) CQDLRTG---CADMAVVAGSCLILSPDMFISESKLSHMLS-----PTG   |     |
| Syn8      | (184) VRDLAAEGGAAGSDMAIVAGCGLLLDPLMYIAESKLSRMLS-----PTG  |     |
| ChPKS2    | (181) SQSLRSG---ETEMCIVSGCALNISPWRWTMLSNLTMLN-----PDG    |     |
| ChPKS1    | (185) CQSLLVG---DVRQALVAGSSLILGPEMMVTSMMKFSL-----PDG     |     |
| BfPKS8    | (183) CQSIRNG---ECKSAITGGCHLNMLPENWISIPFCEIPSNKYRLFSDEG  |     |
| LDKS      | (184) IQSLRAG---ESDMAIVAGANLLNPDVFTTMSNLGFLS-----SDG     |     |
| ncu04865  | (184) CQSLRSG---ESTMSIVGGANIMFNPDMFLAMSSMTLIS-----KDG    |     |
| FUM1      | (183) VRAIRAG---DCDGAIVAGTNLVPFPTMSVAMTEQGVLS-----PDA    |     |
| ncu09638  | (184) VNPAIRAG---DCDSAIVASANWIADPGVQIALDKLGALS-----ASA   |     |
| ncu02918  | (184) VAALIAG---ECDSAIVAGANLIQSPQQLATMKAGVLS-----KTS     |     |
| AtMSAS    | (183) RQAILQG---ESEVAIVGGVNALCGPLTRVLDKAGATS-----TEG     |     |
| PgPKS2    | (183) RQAIRAG---ETDLAIVAGVNALGPGLTRVLDKAGALS-----ADG     |     |
| EpoD      | (178) CRSLRAG---ESDLAIVAGVSTLSPDMMEAAARTQALS-----PDG     |     |
| MxaC      | (177) CQSLRNR---ECNMALVAGVNLLSPQSVLLVSKLQALS-----PDG     |     |
| MxaD      | (184) CQSLRNR---ECDLALVAGVNLLMMPDATIALSSSRGLS-----PDG    |     |
| pks ST    | (183) CNSLWRG---DCDTAVVAGGTNMFIPDGHTGLDKGFSL-----RTG     |     |
| AnWA      | (183) CNSIWRN---DCDTAIVGGVNLLTNPDNHAGLDRGHFSL-----RTG    |     |
| ClPKS1    | (183) CNSLWQK---DCDTAIVGGLSCMTNPDI FAGLSRGQFSL-----KTG   |     |
| Atat1     | (183) CTSLLAK---ECDTALVAGLVNMTTPDLFAGLSRAHFSL-----KTG    |     |
| Consensus | (201) VQSLRSG ES MAIAAG NLIL PEMFIA SKL MLS PTG          |     |

|           | 251   | 300                                                                                                                                                                                  |
|-----------|-------|--------------------------------------------------------------------------------------------------------------------------------------------------------------------------------------|
| ACE1      | (223) | RSRMWDASA-DGYARGE <del>G</del> FA <del>S</del> IVL <del>K</del> PLSV <del>A</del> L <del>A</del> NGDHI <del>E</del> CI <del>I</del> RE <del>T</del> GCN <del>Q</del> DG              |
| Syn7      | (181) | RSRMWDAGA-DGYARGE <del>G</del> IACV <del>V</del> LK <del>T</del> LSQ <del>A</del> LADGDTIE <del>A</del> LIRE <del>T</del> GVG <del>Q</del> DG                                        |
| Syn6      | (223) | RSSMWD <del>E</del> K <del>A</del> -NGYARGE <del>G</del> VAAV <del>V</del> LK <del>T</del> LSQ <del>A</del> LS <del>D</del> GDNI <del>E</del> CVIRE <del>T</del> GVN <del>Q</del> DG |
| LNKS      | (223) | RSRMWDAGA-DGYARGE <del>A</del> VCS <del>V</del> VL <del>K</del> TLSQ <del>A</del> LRDGD <del>T</del> IE <del>C</del> VIRE <del>T</del> GVN <del>Q</del> DG                           |
| GmPKS9    | (223) | RSRMWDANA-DGYARGE <del>G</del> FA <del>S</del> IVL <del>K</del> LSQ <del>A</del> LADGDPI <del>E</del> CI <del>I</del> RE <del>T</del> GVN <del>Q</del> DG                            |
| GmPKS1    | (223) | RSKMWDQDV-NGYARGE <del>G</del> IAAV <del>V</del> LK <del>T</del> LSAA <del>I</del> RDN <del>D</del> HID <del>C</del> IIRAT <del>G</del> VN <del>Q</del> DG                           |
| BfPKS5    | (223) | TSKMWD <del>E</del> SA-DGYARGE <del>G</del> IASV <del>V</del> MK <del>R</del> LS <del>D</del> ALRDGDPI <del>E</del> CVIR <del>G</del> TGVN <del>Q</del> DG                           |
| ChPKS16   | (223) | LSRMWDKDA-NGYARGE <del>G</del> VTAV <del>V</del> LK <del>T</del> LSQ <del>A</del> LADNNRI <del>E</del> AVVIRE <del>T</del> GMN <del>S</del> DG                                       |
| FG10464   | (192) | KSRMWDADA-DGYARGE <del>G</del> VAAV <del>V</del> LK <del>T</del> LSAA <del>I</del> EDND <del>V</del> IE <del>C</del> IIRE <del>T</del> GVN <del>Q</del> DG                           |
| mg03818   | (208) | RRRLRKRGR-RGGG-----HLK <del>R</del> LS <del>D</del> AVADGDFIE <del>S</del> VIRE <del>T</del> GV <del>A</del> QD <del>G</del>                                                         |
| Syn2      | (223) | RSRMWD <del>A</del> E <del>A</del> -NGYARGE <del>G</del> VAAV <del>V</del> LK <del>T</del> LSQ <del>A</del> LADGDHI <del>E</del> CI <del>I</del> RE <del>T</del> GIN <del>Q</del> DG |
| mg03810   | (223) | RCRMWDASA-DGYGR <del>G</del> DCVA <del>V</del> LV <del>K</del> TLSQ <del>A</del> LIEDGDRI <del>E</del> SVIRE <del>T</del> GIN <del>Q</del> DG                                        |
| ChPKS17   | (223) | RSRMWDAAA-DGYARGE <del>G</del> AAALIM <del>K</del> KL <del>S</del> H <del>A</del> LADGDEV <del>V</del> CI <del>I</del> RE <del>T</del> GVN <del>S</del> DG                           |
| GmPKS10   | (223) | RSRMWDASA-NGYARGE <del>G</del> VAAIM <del>M</del> K <del>T</del> LSQ <del>A</del> LADGDHI <del>E</del> GI <del>I</del> RE <del>I</del> GVN <del>S</del> DG                           |
| af04917   | (224) | RSQMWDQAA-DGYARGE <del>G</del> VCV <del>F</del> FM <del>K</del> TLSQ <del>A</del> LRDGDRI <del>D</del> ALL <del>R</del> E <del>T</del> CVN <del>S</del> DG                           |
| ncu08399  | (223) | RCHMWD <del>D</del> RA-DGYARGE <del>G</del> VAAIF <del>I</del> K <del>P</del> L <del>S</del> K <del>A</del> LADGDRI <del>E</del> AI <del>I</del> RE <del>T</del> GVN <del>S</del> DG |
| BfPKS6    | (223) | RSQMWD <del>S</del> RA-DGYARGE <del>G</del> TAAIV <del>L</del> K <del>T</del> LK <del>N</del> ALEDGDDI <del>E</del> YI <del>I</del> RE <del>T</del> GVN <del>S</del> DG              |
| BfPKS3    | (222) | TRKMWDASA-DGYARGE <del>G</del> CGSV <del>M</del> LK <del>L</del> LED <del>A</del> IRDGDRI <del>E</del> SVIRE <del>T</del> GVN <del>S</del> DG                                        |
| BfPKS4    | (213) | SCKMWD <del>T</del> EA-DGYARGE <del>G</del> ILAML <del>L</del> K <del>P</del> LRL <del>A</del> LADGDNI <del>Q</del> CVIRE <del>T</del> GVN <del>H</del> NG                           |
| AN8412    | (224) | CSRMWDKDA-NGYARGE <del>G</del> VGV <del>L</del> V <del>L</del> K <del>P</del> LSRA <del>I</del> MDGDH <del>V</del> EAVIR <del>S</del> TGVN <del>S</del> DG                           |
| mg09589   | (230) | HCRMWD <del>S</del> SA-DGYARGE <del>G</del> AAALF <del>L</del> K <del>P</del> LSRA <del>L</del> ADGDPV <del>H</del> GVIR <del>A</del> SGVN <del>S</del> DG                           |
| Syn8      | (227) | TSKMWDAAA-DGYARGE <del>G</del> VAAV <del>V</del> LK <del>T</del> LSRA <del>L</del> RDGDPI <del>R</del> GV <del>V</del> RATGVN <del>S</del> DG                                        |
| ChPKS2    | (220) | LSKSFDPQADAGYVRGEGAA <del>S</del> IIV <del>K</del> PLDA <del>A</del> IRDND <del>R</del> VHCV <del>L</del> SDIGVN <del>H</del> NG                                                     |
| ChPKS1    | (224) | RCYAFD <del>E</del> RA-NGYARGE <del>G</del> VAV <del>L</del> LK <del>R</del> LED <del>A</del> LADNDTIRAVIR <del>G</del> TGCN <del>Q</del> DG                                         |
| BfPKS8    | (229) | RSFSFD <del>S</del> RG-TGYGRGEGCGLIV <del>L</del> K <del>P</del> LEQ <del>A</del> LKDNDNIRAVIR <del>G</del> S <del>G</del> IN <del>Q</del> DG                                        |
| LDKS      | (223) | ISYSFD <del>S</del> RA-DGYGRGEGVAAIV <del>L</del> K <del>T</del> LPD <del>A</del> V <del>R</del> DGDPI <del>R</del> LIV <del>R</del> E <del>T</del> AIN <del>Q</del> DG              |
| ncu04865  | (223) | RSWAFD <del>S</del> RA-NGYGRGEGSATV <del>V</del> LK <del>P</del> LDAA <del>L</del> RDGDPI <del>R</del> AVIR <del>D</del> S <del>G</del> IN <del>Q</del> DG                           |
| FUM1      | (222) | SCKTFDANA-NGYARGE <del>A</del> INAI <del>F</del> LK <del>P</del> LNNAL <del>R</del> E <del>G</del> DP <del>I</del> RALV <del>R</del> ATSSN <del>S</del> DG                           |
| ncu09638  | (223) | RCHTFDARA-EGYARGE <del>G</del> FGATY <del>L</del> K <del>R</del> PSLA <del>I</del> ADMSP <del>I</del> RAMIR <del>G</del> TAIN <del>S</del> NG                                        |
| ncu02918  | (223) | TCHTFD <del>S</del> SA-DGYGRADGIGALLV <del>K</del> R <del>L</del> SDA <del>I</del> RDGDPI <del>R</del> SVIR <del>G</del> TAIN <del>S</del> NG                                        |
| AtMSAS    | (222) | RCLSFDEDA-KGYGRGEGAAV <del>V</del> LK <del>R</del> LSTA <del>I</del> RDGDHIRAI <del>K</del> GSAVA <del>Q</del> DG                                                                    |
| PgPKS2    | (222) | KCRSFD <del>D</del> SA-NGYGRGEGAGV <del>V</del> LK <del>R</del> L <del>E</del> K <del>A</del> LTDGDRV <del>L</del> AVL <del>K</del> GSAVA <del>S</del> DG                            |
| EpoD      | (217) | RCRTFDASA-NGFVRGEGCGLV <del>V</del> LK <del>R</del> LSDA <del>Q</del> RDGDR <del>I</del> WALIR <del>G</del> SAIN <del>H</del> DG                                                     |
| MxaC      | (216) | RSKAFDASA-NGFTRGEGCGIV <del>V</del> LK <del>R</del> LSDA <del>L</del> ADGDHILATIR <del>G</del> SAIN <del>Q</del> DG                                                                  |
| MxaD      | (223) | RCKTFDAAA-NGFVRAEGCV <del>V</del> LV <del>L</del> K <del>R</del> LSDA <del>L</del> ASGDEILSLIAGSAV <del>N</del> QD <del>G</del>                                                      |
| pks ST    | (222) | NCKAFDDAA-DGYCR <del>A</del> EGVGT <del>V</del> V <del>L</del> K <del>R</del> LED <del>A</del> LADNDPIL <del>G</del> VINGAYTN <del>H</del> SA                                        |
| AnWA      | (222) | NCNTFD <del>D</del> GA-DGYCRADGVGT <del>V</del> V <del>L</del> K <del>R</del> LED <del>A</del> LADNDPIL <del>G</del> VINGAYTN <del>H</del> SA                                        |
| ClPKS1    | (222) | PCATFDNGA-DGYCRADGCASVIV <del>K</del> R <del>L</del> DDA <del>L</del> ADKDNV <del>L</del> AVILGTAT <del>N</del> HSA                                                                  |
| Atat1     | (222) | SCKTFDDGA-DGFCR <del>G</del> DGVGT <del>V</del> V <del>L</del> K <del>R</del> LED <del>A</del> EADNDPILAV <del>L</del> GTAT <del>N</del> HSS                                         |
| Consensus | (251) | RSRMWDA A DGYARGE <del>G</del> VAAV <del>V</del> LK LS ALADGD I AVIRE <del>T</del> GVN DG                                                                                            |

|           | 301   | 350                                                   |
|-----------|-------|-------------------------------------------------------|
| ACE1      | (272) | RTKGITMPSPLAQCKLIQETYKRAG-LDLSKSSDRPQYFEAHGTGTPAGD    |
| Syn7      | (230) | RTTGITMPSNVAQASLIKATYARAG-LDLNEPQGRPQFFFEAHGTGTPAGD   |
| Syn6      | (272) | RTPGITMPSHQAEALIRETYAAAG-LDLSRAEDRCQYFEAHGTGTPAGD     |
| LNKS      | (272) | RTTGITMPNHSAQEALIKATYAQAG-LDITKAEDRCQFFFEAHGTGTPAGD   |
| GmPKS9    | (272) | KTPGLTVPNSIAQTA LIRDVYQRAG-LDITKPSDRPQLFHAHGTGTKAGD   |
| GmPKS1    | (272) | RTPGLTMSATAQAADLIRSTYARAG-LDINKPEDRPQFFFEAHGTGTPAGD   |
| BfPKS5    | (272) | KTPGLTMPNGKAQADLIRDTYQRAG-LDIHDPDRPQFFFEAHGTGTQAGD    |
| ChPKS16   | (272) | ATPGITMPSASAQRDLIRSVYRKAG-LDPESAEDRPQYIEAHGTGTPAGD    |
| FG10464   | (241) | KTRGITMPSAQAQASLIRQTYAKAG-LDPATPEGRCQFFFEAHGTGTPAGD   |
| mg03818   | (249) | RTNGITMPSAQAQANLIRRVYAKAG-LDVNR--QGQYFEAHGTGTPAGD     |
| Syn2      | (272) | KTPGITMPSATAQAALIRSTYARAG-LDLRKASDRPQFFFEAHGTGTPAGD   |
| mg03810   | (272) | ATGGITVFNASAQIALIRDTYRRAG-LDLAKRSDRPQFFFECHGTGTPAGD   |
| ChPKS17   | (272) | RTNGITMPSAEQAALIRKTYARAG-LDPLK--DGCQFFFEAHGTGTQAGD    |
| GmPKS10   | (272) | RTNGITLPSDAQKVLIRQTYRNAG-LDVFK--DRCQFFFEAHGTGTPAGD    |
| af04917   | (273) | RTQGIALPSAEQVSLMRTAYKNAG-LDLSKAEDRPQYIEAHGTGTQAGD     |
| ncu08399  | (272) | RSKGITMPNWEAQSA LIQDTYRRSG-LNARDPIDRCQFFFEAHGTGTAAGD  |
| BfPKS6    | (272) | KSKGITMPLAASQADLIRQTYARAG-LDCTKPSERCQYFEAHGTGTPAGD    |
| BfPKS3    | (271) | RTNGITMPSASSQEKLIKETYRRAG-LDPSKESDRPQFFFEAHGTGLAGD    |
| BfPKS4    | (262) | RTSGITLPSASAQTS LIRDVYHRAG-LDPTNPSDRPQYIEAHGTGTQAGD   |
| AN8412    | (273) | RTKGITMPNAESQTE LIRQTYRDAG-LDPIR--DRCQYFECHGTGTATGD   |
| mg09589   | (279) | RTPGITMPSYRAQARLIKDVYKSAG-LNPLKPEDRCQYFEAHGTGTQAGD    |
| Syn8      | (276) | RTPGITMPSAEQAASLIWDTYRAAG-LDPFNVEERCQYFEAHGTGTPAGD    |
| ChPKS2    | (270) | RTNGYTLPDARMQASLMRELQVRLD-ITKPDF----GFVEAHAPGTRVGD    |
| ChPKS1    | (273) | KTPGITMPNSVSEQEALIRSVYKKAALDPLDT----TYVECHGTGTQAGD    |
| BfPKS8    | (278) | KTPGITMPNGSAQESLMKWVYESAG-IDPKDT----GYVEAHGTGTVKVG    |
| LDKS      | (272) | RTPALSTPSGEAQECLIQDCYQKQALDPKQT----SYVEAHGTGTRAGD     |
| ncu04865  | (272) | KTETITTPSGEAQEALIRACYERAG-LDPGQT----TYFEAHGTGTPAGD    |
| FUM1      | (271) | KTPGMSMPSSESHAE LIRRAYGEVF-LDPKDT----CFVEAHGTGTSVGD   |
| ncu09638  | (272) | RTGGITRPSANGQETVIREAYRNAGNLFFRDT----SYFECHGTGTYVGD    |
| ncu02918  | (272) | KTNGITLPSADGQEA VIRKAYAQAG-LGFNET----DYIECHGTGTAVGD   |
| AtMSAS    | (271) | KTNGITMAPNAKAQELVAWNA LR TAG-VDPLTVG----YVEAHATSTPLGD |
| PgPKS2    | (271) | KTLGITMAPNAQAQILVAQKALKEAR-VTPDSIS----YIEAHATSTSLGD   |
| EpoD      | (266) | RSTGLTAPNVLAQETVLRREALRSAH-VEAGA----VDYVETHGTGTSLGD   |
| MxaC      | (265) | KSTGLTTPNVLSQQA LIRQALESSE-LKAEQ----VS YVEAHGTGTPPLGD |
| MxaD      | (272) | ASSGLMVPNGPAQERVIEQALASGG-LKPSQ----ISFVEAHGTGTSLGD    |
| pks ST    | (271) | MSDSMTRPFPKPAQIDNMSALLSTAG-ISPDLDS----YIEMHGTGTQVGD   |
| AnWA      | (271) | EAVSITRPHVGAQAFIFKLLNEAN-VDPKNIS----YIEMHGTGTQAGD     |
| ClPKS1    | (271) | DAISITHPHGPTQSILSRAILDDAG-VDPLDVD----YVEMHGTGTQAGD    |
| Atat1     | (271) | EAVSITRPHGPAQEALYRKILKHTG-VDPVVDS----YVEMHGTGTQAGD    |
| Consensus | (301) | RT GITMPSA AQ ALIR Y AG LDP R QYFEAHGTGT AGD          |

|           | 351                                                                                                                                                                                                                                                           | 400 |
|-----------|---------------------------------------------------------------------------------------------------------------------------------------------------------------------------------------------------------------------------------------------------------------|-----|
| ACE1      | (321) PV <b>E</b> A <b>E</b> A <b>I</b> STAF <b>F</b> GPESGFRRTSH-----DP-----K <b>L</b> Y <b>V</b> GS <b>V</b>                                                                                                                                                |     |
| Syn7      | (279) PQ <b>E</b> A <b>E</b> A <b>I</b> SKAF <b>F</b> SSGQ-----DMQD <b>L</b> Y <b>V</b> GS <b>I</b>                                                                                                                                                           |     |
| Syn6      | (321) PQ <b>E</b> A <b>E</b> A <b>I</b> SRS <b>F</b> FGHGERPPRE-----E <b>P</b> L <b>Y</b> GS <b>I</b>                                                                                                                                                         |     |
| LNKS      | (321) PQ <b>E</b> A <b>E</b> A <b>I</b> ATA <b>F</b> FGHEQVARSDG-----NERAP <b>L</b> F <b>V</b> GS <b>A</b>                                                                                                                                                    |     |
| GmPKS9    | (321) PK <b>E</b> A <b>E</b> A <b>I</b> FRA <b>F</b> FGDDQPHDEK-----L <b>N</b> V <b>I</b> S <b>I</b>                                                                                                                                                          |     |
| GmPKS1    | (321) PR-- <b>E</b> A <b>E</b> ASTVRSIPDVKDDK-----L <b>Y</b> GS <b>I</b>                                                                                                                                                                                      |     |
| BfPKS5    | (321) PQ <b>E</b> S <b>Q</b> A <b>I</b> DSA <b>F</b> FGSPDKKLET-----M <b>A</b> V <b>G</b> S <b>I</b>                                                                                                                                                          |     |
| ChPKS16   | (321) P <b>I</b> E <b>A</b> E <b>A</b> I <b>I</b> STAF <b>F</b> GEGAKMTP-----I <b>Y</b> T <b>G</b> S <b>I</b>                                                                                                                                                 |     |
| FG10464   | (290) PQ <b>E</b> A <b>E</b> A <b>I</b> KTA <b>F</b> FPNETDSVTNGT-----N <b>G</b> LL <b>S</b> E <b>A</b> D <b>N</b> L <b>L</b> V <b>G</b> S <b>I</b>                                                                                                           |     |
| mg03818   | (296) P <b>I</b> E <b>A</b> E <b>A</b> I <b>H</b> AV <b>F</b> GGARASDEPN-----A <b>P</b> P <b>L</b> Y <b>V</b> GS <b>V</b>                                                                                                                                     |     |
| Syn2      | (321) P <b>I</b> E <b>A</b> A <b>A</b> I <b>I</b> SKA <b>F</b> FGDDVKPHSR-----D <b>G</b> H <b>D</b> T <b>L</b> F <b>V</b> GS <b>I</b>                                                                                                                         |     |
| mg03810   | (321) P <b>L</b> E <b>A</b> R <b>A</b> V <b>H</b> EAL <b>G</b> KH <b>I</b> V <b>V</b> DES-----P <b>G</b> R <b>P</b> P <b>L</b> Y <b>V</b> GS <b>I</b>                                                                                                         |     |
| ChPKS17   | (319) PQ <b>E</b> A <b>R</b> A <b>I</b> H <b>D</b> V <b>F</b> PE-----L <b>R</b> D <b>S</b> A <b>D</b> V <b>L</b> Y <b>V</b> GS <b>V</b>                                                                                                                       |     |
| GmPKS10   | (319) P <b>L</b> E <b>A</b> R <b>A</b> I <b>H</b> E <b>A</b> F <b>F</b> DG-----S <b>D</b> I <b>V</b> N <b>E</b> P <b>M</b> Y <b>V</b> GS <b>V</b>                                                                                                             |     |
| af04917   | (322) P <b>R</b> E <b>A</b> Y <b>A</b> I <b>A</b> T <b>T</b> F <b>F</b> PP-----G <b>E</b> -----D <b>H</b> S <b>H</b> R <b>P</b> K <b>L</b> V <b>V</b> GS <b>V</b>                                                                                             |     |
| ncu08399  | (321) P <b>N</b> E <b>A</b> R <b>A</b> I <b>E</b> DA <b>F</b> FG <b>R</b> N <b>V</b> STSSQ-----D <b>T</b> A <b>E</b> V <b>S</b> K <b>L</b> L <b>V</b> GS <b>V</b>                                                                                             |     |
| BfPKS6    | (321) P <b>V</b> E <b>A</b> E <b>A</b> I <b>S</b> SA <b>F</b> FPQ-----R <b>S</b> -----D <b>I</b> L <b>N</b> S <b>E</b> P <b>L</b> H <b>V</b> GS <b>I</b>                                                                                                      |     |
| BfPKS3    | (320) P <b>V</b> E <b>A</b> E <b>A</b> I <b>S</b> RA <b>F</b> D <b>L</b> Y <b>Q</b> T---S <b>H</b> -----L <b>M</b> Q <b>D</b> N <b>L</b> P <b>L</b> S <b>V</b> GS <b>I</b>                                                                                    |     |
| BfPKS4    | (311) P <b>L</b> E <b>A</b> E <b>A</b> I <b>A</b> A <b>A</b> F <b>S</b> L <b>T</b> SSQP-----D <b>E</b> A <b>H</b> M <b>L</b> V <b>G</b> S <b>I</b>                                                                                                            |     |
| AN8412    | (320) P <b>L</b> E <b>A</b> R <b>A</b> V <b>H</b> DA <b>F</b> FP <b>T</b> E <b>T</b> R <b>T</b> ASN-----T <b>L</b> I <b>P</b> D <b>G</b> K <b>L</b> V <b>V</b> GS <b>V</b>                                                                                    |     |
| mg09589   | (328) P <b>V</b> E <b>A</b> H <b>G</b> V <b>F</b> DA <b>F</b> FP <b>S</b> T <b>E</b> S <b>D</b> GE <b>P</b> DD <b>F</b> F <b>S</b> T <b>G</b> S <b>H</b> E <b>V</b> S <b>D</b> GR <b>L</b> E <b>D</b> D <b>D</b> G <b>K</b> Q <b>L</b> V <b>V</b> GS <b>I</b> |     |
| Syn8      | (325) P <b>V</b> E <b>A</b> R <b>G</b> I <b>F</b> K <b>S</b> F <b>D</b> P <b>E</b> SAK-----K <b>S</b> R <b>T</b> S <b>E</b> E <b>T</b> P <b>L</b> L <b>V</b> GS <b>V</b>                                                                                      |     |
| ChPKS2    | (315) P <b>I</b> E <b>I</b> S <b>A</b> L <b>Q</b> E <b>V</b> F <b>S</b> T <b>S</b> AR-----T <b>L</b> E <b>D</b> P <b>L</b> L <b>I</b> G <b>S</b> V                                                                                                            |     |
| ChPKS1    | (318) T <b>E</b> A <b>S</b> A <b>L</b> S <b>K</b> V <b>F</b> S <b>P</b> -----G <b>R</b> R <b>L</b> P <b>L</b> L <b>I</b> G <b>S</b> V                                                                                                                         |     |
| BfPKS8    | (323) P <b>I</b> E <b>A</b> T <b>A</b> L <b>Y</b> N <b>V</b> F <b>G</b> E-GR-----N <b>A</b> R <b>N</b> P <b>L</b> F <b>I</b> G <b>S</b> V                                                                                                                     |     |
| LDKS      | (317) P <b>L</b> E <b>L</b> A <b>V</b> I <b>S</b> A <b>A</b> F <b>P</b> G <b>Q</b> Q-----I <b>Q</b> V <b>G</b> S <b>V</b>                                                                                                                                     |     |
| ncu04865  | (317) P <b>I</b> E <b>V</b> K <b>A</b> I <b>A</b> R <b>V</b> F <b>K</b> D <b>S</b> R <b>K</b> G <b>N</b> -----G <b>E</b> D <b>A</b> L <b>L</b> R <b>I</b> G <b>S</b> V                                                                                        |     |
| FUM1      | (316) P <b>L</b> E <b>A</b> T <b>A</b> I <b>A</b> R <b>V</b> F <b>G</b> -----G <b>S</b> S <b>D</b> N <b>K</b> L <b>Y</b> I <b>G</b> S <b>V</b>                                                                                                                |     |
| ncu09638  | (318) P <b>I</b> E <b>V</b> A <b>A</b> L <b>G</b> R <b>V</b> F <b>A</b> PE-----R <b>S</b> S <b>D</b> D <b>P</b> L <b>L</b> I <b>G</b> S <b>V</b>                                                                                                              |     |
| ncu02918  | (317) P <b>I</b> E <b>V</b> E <b>A</b> V <b>S</b> R <b>V</b> F <b>K</b> -----K <b>P</b> Q <b>G</b> A <b>P</b> L <b>L</b> I <b>G</b> S <b>V</b>                                                                                                                |     |
| AtMSAS    | (316) P <b>T</b> E <b>V</b> S <b>A</b> V <b>S</b> A <b>V</b> Y <b>G</b> K <b>G</b> -----R <b>P</b> E <b>G</b> N <b>P</b> C <b>F</b> I <b>G</b> S <b>V</b>                                                                                                     |     |
| PgPKS2    | (316) P <b>T</b> E <b>T</b> S <b>A</b> L <b>A</b> G <b>V</b> Y <b>G</b> A <b>G</b> S <b>G</b> -----R <b>H</b> P <b>C</b> N <b>P</b> C <b>Y</b> I <b>G</b> S <b>I</b>                                                                                          |     |
| EpoD      | (311) P <b>I</b> E <b>V</b> E <b>A</b> L <b>R</b> A <b>T</b> V <b>G</b> P <b>A</b> R-----S <b>D</b> G <b>T</b> R <b>C</b> V <b>L</b> G <b>A</b> V                                                                                                             |     |
| MxaC      | (310) P <b>I</b> E <b>A</b> E <b>A</b> L <b>R</b> E <b>T</b> Y <b>G</b> V <b>P</b> R-----P <b>D</b> G <b>S</b> V <b>C</b> G <b>I</b> G <b>S</b> V                                                                                                             |     |
| MxaD      | (317) P <b>I</b> E <b>L</b> Q <b>A</b> L <b>A</b> R <b>V</b> L <b>G</b> T <b>G</b> R-----S <b>A</b> E <b>T</b> P <b>L</b> F <b>V</b> GS <b>V</b>                                                                                                              |     |
| pks ST    | (316) A <b>V</b> E <b>M</b> E <b>S</b> V <b>L</b> S <b>L</b> F <b>A</b> P <b>D</b> E <b>T</b> -----F <b>R</b> P <b>R</b> D <b>K</b> P <b>L</b> Y <b>V</b> GS <b>A</b>                                                                                         |     |
| AnWA      | (316) A <b>V</b> E <b>M</b> Q <b>S</b> V <b>L</b> D <b>V</b> F <b>A</b> P <b>D</b> H <b>R</b> -----R <b>G</b> P <b>Q</b> S <b>L</b> H <b>L</b> G <b>S</b> A                                                                                                   |     |
| ClPKS1    | (316) G <b>T</b> E <b>M</b> V <b>S</b> V <b>T</b> N <b>V</b> F <b>A</b> P <b>A</b> D <b>R</b> -----K <b>R</b> P <b>A</b> D <b>R</b> P <b>L</b> Y <b>L</b> G <b>A</b> V                                                                                        |     |
| Atat1     | (316) G <b>T</b> E <b>M</b> K <b>S</b> I <b>T</b> N <b>V</b> F <b>A</b> P <b>R</b> D <b>K</b> G-----R <b>R</b> Q <b>P</b> D <b>Q</b> L <b>I</b> H <b>L</b> G <b>A</b> L                                                                                       |     |
| Consensus | (351) P <b>I</b> E <b>A</b> <b>A</b> I <b>F</b> <b>L</b> <b>V</b> GS <b>V</b>                                                                                                                                                                                 |     |



|           | 401   |                                            | 450                                |
|-----------|-------|--------------------------------------------|------------------------------------|
| ACE1      | (353) | KTVIGHTEGTAGLAGLIKASLAMKAKSI               | PPNLHLE---RVNP--AVQPFY             |
| Syn7      | (305) | KTVIGHTEGTAGIAGLLKCSLAVQNGI                | VPPNMLLQ---KLSP--RVEPFT            |
| Syn6      | (350) | KTVIGHTEGTAGVAGLIKASLAMQNRT                | I                                  |
| LNKS      | (354) | KTVVGHTEGTAGLAGLMKASFVRHGVI                | PPNLLFD---KISP--RVAPFY             |
| GmPKS9    | (348) | KTQIGHTEGTAGLASLIGTMMAMKNA                 | TVPPNMHFE---TLNP--DIEPFY           |
| GmPKS1    | (346) | KTVLGHTEGTAGLASLIGTALAIQNK                 | T                                  |
| BfPKS5    | (348) | KTIIGHTEGTAGLASLIGSVMAIKHG                 | VFPNLFHQ---NLSP--KVAPFY            |
| ChPKS16   | (348) | KTVLGHTEGSAGLALIKVVTQAMQNS                 | T                                  |
| FG10464   | (328) | KTVIGHTEGTAGLAGLIKACMALKHGA                | VPPNLLFN---RLNP--ALEPFT            |
| mg03818   | (326) | KTIIGHTEGTAGLAGLIKATLALQQR                 | T                                  |
| Syn2      | (353) | KTVIGHTEGTAGLAIKASTALQAGVL                 | PPNRLFH---KLNP--KIEPYY             |
| mg03810   | (352) | KTVIGHTEATAGIAGLIKASLALQNG                 | L                                  |
| ChPKS17   | (346) | KTVIGHLEGAAGVAGLIKAAEAVRRA                 | VPPNMLLQ---KLNP--AIEPFC            |
| GmPKS10   | (346) | KTAIGHLEGCAGLAGMIKAIIEAVK                  | T                                  |
| af04917   | (351) | KTIIGHTEGCAGIAGILKAVLAMRHK                 | T                                  |
| ncu08399  | (355) | KTVIGHTEGAAGLAGLKVVHAMINGT                 | VPPNLHFN---RLQP--AVAKYY            |
| BfPKS6    | (350) | KTVIGHLEGAAGLAGIKAGLALKEKT                 | I                                  |
| BfPKS3    | (351) | KTIIGHLEGCAGIAGLIKASLALQHS                 | F                                  |
| BfPKS4    | (339) | KTVIGHTEGAAGLAGVLKASLAIQHGI                | I                                  |
| AN8412    | (354) | KTIIGHLEGCAGIAGVLKAVLAIKNR                 | T                                  |
| mg09589   | (378) | KTVLGHLEGCAGLAGIKVLLAMKHGV                 | VPPNKHV---KLNP--KIVQFS             |
| Syn8      | (358) | KTIIGHLEGCAGLAGIKVLLVAMEHDT                | I                                  |
| ChPKS2    | (342) | KANVGHLESSSGFPSLIKAAAMMLK                  | GLVVPNANFE---NESMN--SHLKE          |
| ChPKS1    | (342) | KTNIGHLEGASGLAGVVKSIIMLEQ                  | GVILPNRNFE---ETKHENPAGKME          |
| BfPKS8    | (349) | KSNIGHLEAASGIISVKTAMMLERGF                 | ILPNHDFK---TPNEN--IPFSK            |
| LDKS      | (338) | KANIGHTEAVSGLASLIKVALAVEKGV                | I                                  |
| ncu04865  | (346) | KTNIGHTEATSGVAATIKVALALERG                 | Q                                  |
| FUM1      | (340) | KPNLGHSEGASGVSSVMKAVLALENR                 | T                                  |
| ncu09638  | (344) | KSNVGHSEGASALASIMKVVLALEHG                 | A                                  |
| ncu02918  | (341) | KSNLGHSEAAAGLSSI                           | IKVAMALEKGEIPPTYGVK---NINP--KIKTDE |
| AtMSAS    | (342) | KPNVGHLEAGAGAVGFIKAVMAVEKA                 | IFPPQTNLK---RLNS---RIDWD           |
| PgPKS2    | (344) | KPNIGHLEAGAGVMGLIKAVLVLRHG                 | Q                                  |
| EpoD      | (337) | KTNIGHLEAAAGVAGLIKAAALSLT                  | HERIPRNLNFR---TLNP--RIRLEG         |
| MxaC      | (336) | KTNVGHLESAAGIAGIMKVVLAMRHQ                 | S                                  |
| MxaD      | (343) | KTNVGHLEATAGLTGVLKTALALRN                  | ET                                 |
| pks ST    | (345) | KANIGHGEGVSGVTSLIKVLLMMKND                 | T                                  |
| AnWA      | (344) | KSNIGHGEGSASGVTSLVKVLLMMK                  | ENM                                |
| ClPKS1    | (345) | KSNIGHGEEAASGV                             | TALTKVLLMMRKNAI                    |
| Atat1     | (346) | KANIGHGEEASAGVASLIKTVIMMQ                  | KNAI                               |
| Consensus | (401) | KTVIGH EG AGLAGLIKA LAL G IPPNL F LNP I PF |                                    |



|           | 501   |                                                    | 550 |
|-----------|-------|----------------------------------------------------|-----|
| ACE1      | (443) | A-----EVAMVTP-TA-----                              |     |
| Syn7      | (395) | A-----ATPTPRTAT-----                               |     |
| Syn6      | (440) | G-----AGLKQTPQR-----                               |     |
| LNKS      | (444) | E-----QNQLRVSNNEDC-----                            |     |
| GmPKS9    | (437) | L-----HNQAVATTEA-----                              |     |
| GmPKS1    | (436) | T-----T-----DS-----                                |     |
| BfPKS5    | (438) | T-----ESTLIEQ-EA-----                              |     |
| ChPKS16   | (438) | S-----QE--LVEEAS-----                              |     |
| FG10464   | (418) | P-----QNSFATPSSS-----                              |     |
| mg03818   | (416) | L-----RMHQTADQKP-----                              |     |
| Syn2      | (443) | I-----ARRAAAPNP-----                               |     |
| mg03810   | (441) | Q-----AQGTKCAQK-----                               |     |
| ChPKS17   | (436) | T-----FTRRG-----                                   |     |
| GmPKS10   | (436) | S-----SE-----                                      |     |
| af04917   | (441) | I-----HDNGP--WGKPKEMTQVPN-----                     |     |
| ncu08399  | (445) | I-----HDPVAKIFAPTLIVPKLIN-----                     |     |
| BfPKS6    | (438) | T-----PTPSL-----                                   |     |
| BfPKS3    | (441) | L-----DTTESQLSLGKEEMTQIN-----                      |     |
| BfPKS4    | (429) | A-----KNGCQEASLS-----                              |     |
| AN8412    | (443) | S-----SPVREATITP-----                              |     |
| mg09589   | (469) | V-----AAVAGLQEKRDPCSPLLS-----                      |     |
| Syn8      | (448) | L-----EKQDLGRGRKDTQHDVAGR--H-----                  |     |
| ChPKS2    | (426) |                                                    |     |
| ChPKS1    | (431) | L-----RDNSMGT--DSTRFASRRSV-----VVGNVGQTKPA         |     |
| BfPKS8    | (433) |                                                    |     |
| LDKS      | (425) | A-----ETSI CP-----                                 |     |
| ncu04865  | (434) | L-----ATTQRPKALPLTNGTAPGHH-----HHHHHQHTDSG         |     |
| FUM1      | (427) | LGRSLPNESQVAPIRNGNGSVQADSSSAVTSITAMKMEVRRKKRQSAVEA |     |
| ncu09638  | (431) | L-----PDYVAPGIYKRS-----TRDTTNGVNGHMNGRNGSPSH       |     |
| ncu02918  | (432) | -----QMHVP-----VG-----YNRG-----                    |     |
| AtMSAS    | (431) | LQRPT-----                                         |     |
| PgPKS2    | (434) | FLCTDR-----                                        |     |
| EpoD      | (425) | ELWPAAPERS-----                                    |     |
| MxaC      | (424) | VAKDALPQR-----                                     |     |
| MxaD      | (431) | APQAVVPPRG-----                                    |     |
| pks ST    | (437) |                                                    |     |
| AnWA      | (436) |                                                    |     |
| ClPKS1    | (436) |                                                    |     |
| Atat1     | (438) |                                                    |     |
| Consensus | (501) |                                                    |     |



|           | 601   |                                                 | 650 |
|-----------|-------|-------------------------------------------------|-----|
| ACE1      | (484) | LN---PTVDLRSVAYTLNQHR-----SVFDKRAAISAPD----     | L   |
| Syn7      | (441) | -----NNNNNNNNNNNN-----NNNNNRHAVAAA----          | DL  |
| Syn6      | (486) | -----RVODLAWTLNRR-----SVLPVRRAVAAQ----          | TI  |
| LNKS      | (495) | -----HLHDLTWSLLRKR-----SVLPFRRRAIVGH----        | SH  |
| GmPKS9    | (479) | ER---YETNMSDLAWTLHNRR-----STLPYRSSVVVPAG--      | SGN |
| GmPKS1    | (471) | SN---PDLSLKDLAYTLQTRR-----STLAYRVAITASD----     | V   |
| BfPKS5    | (479) | KS---PDVNMHDLAHTLQSRR-----STLAYRKDIMYSS----     | R   |
| ChPKS16   | (478) | AN---PQTNRDLAYTLRERR-----SVLPFRIA FSDTT----     | V   |
| FG10464   | (464) | KD---ESLDLTSLAYILSTKR-----TVLSQRVSI IAST----    | F   |
| mg03818   | (460) | -----LHVHDLALAACR-K-----SLFGYKIAVPATN----       | M   |
| Syn2      | (486) | GG---TGINMRDLAWTLCSTRR-----STLGVRSVLPAAK----    | SP  |
| mg03810   | (484) | -----QDLTAHDLAFTLNSRR-----SALSCRAVFAAR----      | GL  |
| ChPKS17   | (480) | S-----WDLLEYTLQSRR-----SQHYVRLALSSTS----        | R   |
| GmPKS10   | (477) | R-----TESILYTLAHRR-----SQLPLRTFFSGHD----        | L   |
| af04917   | (500) | -----LRLRLAMTLNSHR-----STLPVRSVIPGTS----        | K   |
| ncu08399  | (506) | -----LEEAAWYAYKNR-----TAFPYRTAVSGSS----         | L   |
| BfPKS6    | (479) | N-----LIDLGYSLLG-R-----SNFPTKATFVASN----        | T   |
| BfPKS3    | (492) | N-----LQDICWTALSCR-----SLLPVRASFVGES----        | S   |
| BfPKS4    | (476) | N-----PNELTTLASHR-----SLLPVRVRFPA S----         | SI  |
| AN8412    | (488) | -----IDLESVWTLYARR-----SVLPVKAFFTGGT----        | V   |
| mg09589   | (516) | -----DLNMGDLAWILRTRR-----NQFPVRLAISGASN----     |     |
| Syn8      | (512) | -----SVEQRDLAWTLFARR-----SELGVRMSIPAAKSREDLE    |     |
| ChPKS2    | (470) | -----DASSTTMQNTAYTLGQRR-----SLLSWRATVVASN----   | I   |
| ChPKS1    | (509) | ---SDEKTI LSSLAYTLSDRR-----TWHPWKAALSATT----    | I   |
| BfPKS8    | (479) | ---FFQNGLMSNVAYTLGQRRSLACANLMMVRLQWRVAIPATS---- | S   |
| LDKS      | (478) | ---ADDLQLLANIAYTLGSRR-----SNFRWKAVCTAHS----     | L   |
| ncu04865  | (515) | THSKIAENALLSNLAHTLCDRR-----TLFPWTATFSGAS----    | L   |
| FUM1      | (524) | -----KTDPVDVSYTLANRR-----EHLSHRITYGVVIT----     |     |
| ncu09638  | (510) | -----KLPLADVA YTLGARR-----SKFAQRSFCIVEK----     |     |
| ncu02918  | (480) | -----NVNLA DLAYTLGVKR-----THLSTRGYILSGQ----     |     |
| AtMSAS    | (475) | -----NRTLESIA TTLSTRR-----GHHDYRAAIIAEN----     | H   |
| PgPKS2    | (480) | -----AISLATVASTLSQRR-----AHRFRHAI VADS----      | V   |
| EpoD      | (465) | -----LGLGDVAFSLATTR-----SAMTHRLAVAVTS----       | R   |
| MxaC      | (463) | -----GSLSDVCYTASAHR-----THHTHRLAVLADS----       | R   |
| MxaD      | (471) | -----GALREVCATAALSR-----SHHDHRLALAGRT----       | P   |
| pks ST    | (456) | -----LSYTTTARR-----WHHPHRV SITGAN----           | T   |
| AnWA      | (476) | FG--VKDSNALPSLAYTTTARR-----IHHPFRVTAIGSS----    | F   |
| ClPKS1    | (475) | -----QTPLSHVAYTTTARR-----IQHYWRMNVAA SD----     | L   |
| Atat1     | (477) | -----DTSLPALSYTTTARR-----VHYPHRVS YAVRS----     | I   |
| Consensus | (601) | L D L A Y T L R R S L R A I A S                 |     |

|           | 651                                                       | 700           |
|-----------|-----------------------------------------------------------|---------------|
| ACE1      | (516) DTLKTKLKARSEEAS---PSGKTAAVQSLE---RRPRYLGVFTGQGAQW   |               |
| Syn7      | (468) PGLVRALEAAGKEDVG-VEHTP---KNSS-----PKILGVFTGQGAQW    |               |
| Syn6      | (513) PDVCAALEASIASIDKKEGHVV---SGGSN---REPRVLGIFTGQGAQW   |               |
| LNKS      | (522) ETIRRALEDALIEDGIVSSDFTT---EVRG-----QPSVLGIFTGQGAQW  |               |
| GmPKS9    | (514) PQEAARSAILSEIERL-TDSPHKLHRSLSV---AKPKILGVFSGQGAQW   |               |
| GmPKS1    | (503) EDAYTQLDTIGNGEQ---SSTIGVRQVTK---ASPKIMGVLTGQGAQW    |               |
| BfPKS5    | (511) EDATTKTDSLLSDDAN-AAANGLTSRYTDH---PNARILGIFTGQGAQW   |               |
| ChPKS16   | (510) ESLKLSITTRLAESGS-ESLGVRTWAAGNG---GRSKVLGVFTGQGAQY   |               |
| FG10464   | (496) EQLLEKVEAVLDDSDAS-SVVGSKAATLSHP-----ALLGVFTGQGAQW   |               |
| mg03818   | (487) EDLCSGLLERLENR---NWAKPNGNTSPK-----RLLGIFTGQGAQY     |               |
| Syn2      | (519) QDLLDKLEASAQLP---PPATS--TKKAP---TGPRVFGVFTGQGAQC    |               |
| mg03810   | (514) EDLASKLRDTISDPDWQPTATAPEGKNVGS---RAPRILGVFAGQGAQW   |               |
| ChPKS17   | (507) EDLLRKLKATAQS-----NSNVGINMTKP---SSSFRFLGVFTGQGAQW   |               |
| GmPKS10   | (504) PSLQEKLESAIVE---DVVLPSTKQDSPL--GSAPRILGVFTGQGAQW    |               |
| af04917   | (526) ADVLAAIRTQLAKVGSNPGAEIGTRSSVPEFDHVRPKILGVFTGQGAQW   |               |
| ncu08399  | (532) SDIMKGLDTLIAKAEAGKAATLSVRAR-P---ETDVPKILGIFTGQGAQW  |               |
| BfPKS6    | (505) EDLLDQLEKVIIAKEENPNLAIGIRSTNVNDK---SSRKILGVFTGQGAQW |               |
| BfPKS3    | (519) EDMLAQIKQRLDLSIDSSATLGVASIGD---CHNKILGIFTGQGAQW     |               |
| BfPKS4    | (503) ESLQQAINSSFESGVIGYQSPLK-----ESKILGIFTGQGAQW         |               |
| AN8412    | (516) QRLNFMDFRVAESEETSSSTAGIKYQPLN--PTETPGILGIFTGQGAQW   |               |
| mg09589   | (545) DELQKALQTAAVDKSVECIHAPPQPLVSPS---EGLGLLGVFTGQGAQW   |               |
| Syn8      | (546) QSLQETLSKTTAAEKPTKLGEPPKALASPD---EGVGLGVFTGQGAQW    |               |
| ChPKS2    | (502) DDLIIQAASPQVIPRRVTRQPT-----LVFVFTGQGAQY             |               |
| ChPKS1    | (541) QELITKLEK--VRFVNMAPRHN-----IGFVFTGQGAQW             |               |
| BfPKS8    | (520) FELIQALNSGVKTPMREIEPLR-----IGFVFTGQGAQW             |               |
| LDKS      | (510) TGLAQNLAGEMRPSKS-ADQVR-----LGWVFTGQGAQW             |               |
| ncu04865  | (551) DSLIRTLDSGRVKPAKASAPPR-----IGFVFTGQGAQW             |               |
| FUM1      | (552) -E---STNDTPIVPDFSPLSKTN---N-----NSLPEINMIFTGQGAQW   |               |
| ncu09638  | (538) -D---KVEGLAAKSRVVRAP-----LQPTNLGFI FTGQGAQW         |               |
| ncu02918  | (508) -D---TLKDDLKPENLRVALQGK---T-----YSKLPLAFVFTGQGAQW   |               |
| AtMSAS    | (504) DDAVQKLSDIVNGKAAEWTTSSRVLD-----ASCKDVVVWVFSGHGAQW   |               |
| PgPKS2    | (509) ANAIATLDDLKSNVPNRWAINNRIG-----TEAAKGPVVVFSGHGAQW    |               |
| EpoD      | (493) EGLLAALSAVAQGQTPAGAARCIASS-----SRGKLALLFTGQGAQT     |               |
| MxaC      | (491) EHTAERLRAFARGEQPSGAWSGRKAFG-----GRRKIVFVYFGQGAQR    |               |
| MxaD      | (499) AEFVEKLEAFSRGEAAPGAATGRRTGQ-----ARRRVVVFVFPQGSQW    |               |
| pks ST    | (479) MEILRNVESAIARGHVNRPATK-----PKIIVACSQGSQY            |               |
| AnWA      | (510) QEMRDSL IASSRK-EFVAVPAKT-----PGIGFLFTGQGAQY         |               |
| ClPKS1    | (504) PEAQRLLKDRLKE-NFSPISTQQ-----PKVAFMFTGQGSQHY         |               |
| Atat1     | (506) PETIKSLRSTQSK-AIKPDQASS-----GKIAFLFTGQGSQHY         |               |
| Consensus | (651) DLI L                                               | KILGVFTGQGAQW |

|           | 701   |                        | 750                                    |
|-----------|-------|------------------------|----------------------------------------|
| ACE1      | (559) | ARMGVDVINASPAARAI      | FEDLEQSLKTLPEE-DRPSWSMLEELLAPPE--      |
| Syn7      | (507) | PAMMKQLVVRVP           | SAARIVAELDVSLQTLPKQ-YRPGWTLMEQLMREGD-- |
| Syn6      | (556) | PAMGKMLISTLPHARDV      | ISQLDQSLSSLPFR-YRPSWALHDQLMLEGG--      |
| LNKS      | (563) | PGMLKNLIEASPYVRN       | IVRELDSDLQSLPEK-YRPSWTLTDQFMLEGE--     |
| GmPKS9    | (559) | PRMGAILLESSAWARAKI     | VELDGYLAELPAS-DAPDFTLESEELLAFKE--      |
| GmPKS1    | (545) | PRMGARLVEESAFASQRI     | FELDEALSSLPKD-DRPSWTLREMLLADSK--       |
| BfPKS5    | (556) | PRMGAKLIEKSPFAARR      | MEELDLALSRLPEN-DRPSWTLQNEELLAGAE--     |
| ChPKS16   | (555) | ARMGAELVTQMVLRQI       | LEKLEGYLSELSEG-DRPSWTLTTELLADAS--      |
| FG10464   | (538) | ATMGTKLMRSNPLAQSV      | IQDLDVAVLASLPEC-HRPRWSLGRLELLADT---    |
| mg03818   | (526) | AGMMSGLLQASPWALGR      | ALELEKTLMDLLPAHDRPQNSLVGQLLSSASGK      |
| Syn2      | (560) | PRMGAELEIEDSP          | IVAGIVRRLDQSLQSLPVR-DRPSWTLREHLLAPKE-- |
| mg03810   | (560) | PGMARQLIGDIPFVQQR      | VVELGHLDQLASQ-DAPSWSLRDELGKVVQ---      |
| ChPKS17   | (548) | ATMGSELLRRTCSTAQK      | CFKQLDASLSTLPD---APAWTLSEQCRRAGSD--    |
| GmPKS10   | (547) | PTMGRELLKSSPFARRL      | MASLEESLSSLEPE---PPMWTLTQEQIMADKD--    |
| af04917   | (576) | AGMSQGLMAKSALFRQV      | IEVMEEAMAQLPD---GPEWSLKKEEIMKPPK--     |
| ncu08399  | (578) | ATMSRGLLQSNVYAQSI      | RNLQVLQACPH---PPSWFLEQEQIMADAS--       |
| BfPKS6    | (553) | PAMGKMLIANIPFSQTI      | DSLEKSLRELDPD---APKWSLKDEIVASVG--      |
| BfPKS3    | (564) | ATMGSGLIRSSI           | IFRQSIKNLDHVLQSLPD---GPEWLLSDELLRVP--  |
| BfPKS4    | (541) | AQMGVGLLAHPSLISFL      | DDLDKALQSLPEG-DRPTWSLREELERPSE--       |
| AN8412    | (564) | ALMGFSLQQNHVFRRAI      | ERCQAALATLHDS---PSWSLLDELVKGAD--       |
| mg09589   | (591) | PAMGRELLIQEPVFRRSI     | EACEAALSNLP---DAPDWSLKAELLKTDQED       |
| Syn8      | (592) | AGMGRELMLHNGTFRRAI     | SRCQDALATLPVVADRPAWSLAEELSRGEKQ-       |
| ChPKS2    | (536) | FGVGRELLQ-YPVFSTT      | LKMASACAESFG-----ANFSLQDELYGNEA--      |
| ChPKS1    | (573) | CGMGRELISIFPRFRQSL     | IACDIALQSFSG-----ADFHVIDELEADVE--      |
| BfPKS8    | (554) | NAMGRELYEHYPVFAASL     | DACDKCLVSGF-----APFSLITELNKKDAT--      |
| LDKS      | (544) | FAMGRELIEMYPVFKEAL     | LECDGYIKEMG-----STWSIIEELSRPET--       |
| ncu04865  | (586) | WAMGKELIDAYPIFKAAL     | LDLDCVQLKKG-----ATWNMCEEELSRDAE--      |
| FUM1      | (589) | VGMGKELMDEYETFYNTI     | AYLGLVLSGLEHP---PTWDLIRELSRPAE--       |
| ncu09638  | (572) | HAMGAQLF-EYRVFSTAIR    | YLDHVLSSLPNG---PDWLSLEKILSGDCD--       |
| ncu02918  | (545) | PEMGKELMKEFPSFRRTI     | QRDLAALQMLPHA---PTWTLQGALLEPAK--       |
| AtMSAS    | (548) | TAMATDLLKD-IVFYQTI     | SRLDPIVEREMG-----FSALHSLASGD---        |
| PgPKS2    | (552) | PDMGRELFHSSPVFGEV      | VRNLEPIIQAELG-----FSAIESLQAGC---       |
| EpoD      | (535) | PGMGRGLCAAWPAFREAF     | DRCVTLFDRELD-----RPLREVMWAEAGSA        |
| MxaC      | (534) | AGMGRALMESEPVFRDAL     | VKVDKALQPHLG-----WSVLDELADEQRS         |
| MxaD      | (542) | VGMGRKLEEEPSFRAAL      | ERCDAAIRACAD-----FSVLGELAAEAGRG        |
| pks ST    | (516) | TGMGWQLYNSYPTFRSD      | LERFDQLARSYG-----FPSFLEVYTSKPVG        |
| AnWA      | (546) | AAMGKQLYEDCSHFRAI      | EHLDLCSQGD-----LPSILPLVDGS---          |
| ClPKS1    | (540) | AGLGKDLAHYRVFRSIE      | DFNQLAQIHG-----FPSFLALIDGSE---         |
| Atat1     | (542) | TALGKQLFEDCQTFRND      | VVEFNRIQKQG-----FPTFLPLIDGS---         |
| Consensus | (701) | GMGR LI P FR I LD L LP | P WSL EELL                             |

## AT active site

|                 | 751               | 800                                   |
|-----------------|-------------------|---------------------------------------|
| ACE1 (606)      | -----TSRVYQANI    | SQTVCTAVQVMMVQLLRAAG-IEFSCVVGHS       |
| Syn7 (554)      | -----ESNVRLAAY    | SQPLCAAVQIVLVRLAAAG-VAFDAIVGHS        |
| Syn6 (603)      | -----SSNVHDARF    | SQPLCCAIQILLVQLAAAG-IKLEVAVVGHSS      |
| LNKS (610)      | -----ASNQYATF     | SQPLCCAVQIVLVRLLEAAR-IRFTAVVGHSS      |
| GmPKS9 (606)    | -----TSRVAEAAI    | SQPLCTAVQVLLVDLIRELAGIQLSAVVGHSS      |
| GmPKS1 (592)    | -----SSRIAEAAI    | SQPLCTAVQVVLVDLLRQAG-VELSSVVGHS       |
| BfPKS5 (603)    | -----KSRLESEATI   | AQPLCTAVQIILIDLLKEAG-IKFSGVVGHSS      |
| ChPKS16 (602)   | -----VSRVGEAAI    | SQPLCTAIQIILVDLLRSAN-VKFDTVVGHSS      |
| FG10464 (584)   | -----TSRIKEAEL    | SQPLCTAVQIMLVDLLKANG-VQFQGVVGHSS      |
| mg03818 (576)   | DSSSAAAAAANVMRAEL | SQPLCTMIQILLVDLNNKAG-VTLDAVVGHSS      |
| Syn2 (607)      | -----SSQVYIASL    | SQPLCTALQIILVDLLKVAG-ITFSGVVGHSS      |
| mg03810 (606)   | -----GSNLDLAQF    | SQPLCTALQIQIDLLAAAG-IRFSAVVGHSS       |
| ChPKS17 (593)   | -----TSRLGEAVIA   | AQPLCTAVQIMVVDLLKQAG-VDLHSAVVGHSS     |
| GmPKS10 (592)   | -----TSRLSEAAI    | SQPLCTAVQIMVVDLLRQAG-ISFDCVIGHSS      |
| af04917 (621)   | -----TSRLGEAEI    | SLPVCAALQVGLVKVLRASAG-ITFSMVAVGHSG    |
| ncu08399 (623)  | -----LSRVGKAAI    | SQPLCTAVQIALIDLLAHLG-ITFHTVVGHSS      |
| BfPKS6 (598)    | -----KSSIEKAEF    | SQPLCTALQIALVDLLKLIG-VTFSAVVGHSS      |
| BfPKS3 (609)    | -----ETRLNDAQI    | SQPACTAIQIGLVDLLRAMG-IKMDVVI GHNS     |
| BfPKS4 (588)    | -----ESRIDTPEI    | CQPICTAIQIMLGHLLQKSCGISFSAVVGHSS      |
| AN8412 (609)    | -----ESRIGEAAI    | SQPLCTALQIGLVDMLHSAG-IKLDAAVVGHSS     |
| mg09589 (638)   | -----SRMSEAVLA    | QAPATTAVEIGLVDVLASKG-IRFAAAVVGHSS     |
| Syn8 (641)      | -----SRIAEAEFA    | QPCTAVEIALVDVLAHAG-VRFSAVVGHSS        |
| ChPKS2 (578)    | -----TSRINDADV    | SQPASTAIQIALVDLLRSWG-IQPSAAVVGHSS     |
| ChPKS1 (616)    | -----SSRINKALY    | SQPLCTALQIALVDLLVSWG-IYAQSVTGHSS      |
| BfPKS8 (597)    | -----SSLVNEAHI    | SQPACTAIQIALALTDLLRSWN-VIPAAVAVGHSS   |
| LDKS (587)      | -----ESRVDQAEF    | SLPLSTALQIALVRLLSWN-IQPVAVTSHSS       |
| ncu04865 (629)  | -----TSKVNQLDY    | STPVCVAVQIALVELLKAWG-IKPTAVTSHSS      |
| FUM1 (634)      | -----SSNVGRAEF    | SQPLVCAVQVALVNLLRSWG-ITPAAAVVGHSS     |
| ncu09638 (616)  | -----AALIQRAEI    | SQAVCTAVQVGLVDLLASWS-VRPHSVAVGHSS     |
| ncu02918 (590)  | -----TSMINHASR    | SQPVCTAVQIALVQLLASWG-IKPESVIGHSS      |
| AtMSAS (588)    | -----FESSIKVQV    | LYLVQVGLAAILRSKG-LEPQAVIGHSV          |
| PgPKS2 (593)    | -----LNRTDVVQAM   | TFLMHLGIAAVLEAES-GPPTAVVGHSL          |
| EpoD (579)      | ES-----LLLDQTAFT  | QPALFAVEYALTALWRSWG-VEPELLVGHSI       |
| MxaC (578)      | R-----LAEIDVNQP   | VLFAVEVALTALWRSWG-IEPDAVMGHSM         |
| MxaD (586)      | R-----LHEIDVIQP   | VLFAVEVALAEMWRAWG-IEPSAAVVGHSM        |
| pks ST (559)    | -----DSMEDLLPV    | IQLALVSLMALGNLLGSFG-LKPSAVIGHSL       |
| AnWA (586)      | -----LPLSELSPV    | VVQLGTTCVQMALSSFWASLG-ITPSFVLGHSL     |
| ClPKS1 (581)    | -----PDVAKLSPV    | IIVQLGLCCFEMALARLWASWG-IRPSAAVMGHSL   |
| Atat1 (582)     | -----EDVASLSPV    | ALQLGQSCIQIALARLWKSWG-ITPSSVVLGHSL    |
| Consensus (751) |                   | S V A ISQPLCTAVQIALVDLLRS G I AVVGHSS |



## AT active site

|           | 801   |                                              |       | 850     |
|-----------|-------|----------------------------------------------|-------|---------|
| ACE1      | (646) | GEMAAAYTAGYLSARDAVRAAYFRGVHSQ LAKGSNG-----QP | G     | MIAV    |
| Syn7      | (594) | GEIGCAF AAGYVSAQAIRIAYLRGFTSVHA-----GQD      | G     | MLAA    |
| Syn6      | (643) | GEIACAYAAGLV TASQAIRIAYLRGFVSDKASSP-----NG   | V     | MLAA    |
| LNKS      | (650) | GEIACAF AAGLISASLAIRIAYLRGVVSAGG--A-----R    | G     | MLAA    |
| GmPKS9    | (647) | GEIAAAYAAGFMARRAAIVTAYYRGRYAKLAASPSSS----    | EIK   | MAAV    |
| GmPKS1    | (632) | GEIGAAAYAAGLLTARDAIRVAYYRGLYAKLAQSPNG-----   | RK    | MAV     |
| BfPKS5    | (643) | GEIGAAAYAAGFLSAPHALYIAYYRGFYAHFAGESN-----    | V     | MLAV    |
| ChPKS16   | (642) | GEIAAAYAAGYLSARDAILVSYFRGLHCKLATSPN-----     | GNNIK | MLAA    |
| FG10464   | (624) | GEIAAAYAAGFVSSADAIKIAYYRGYFAKLASGSSSTGKDSSV  | K     | SMMAV   |
| mg03818   | (625) | GEIAAAYAAGRLSAATALAVAYYRGINTKLAGGLDG-----    | KK    | MSAA    |
| Syn2      | (647) | GEIGAAAYAAGYLTASDAIRVAYYRGLHLKLVTTK-----     | G     | MLAA    |
| mg03810   | (646) | GEIAAAYAAGLSDAMDVVAYYRGLHSPRLAGKSK-----      | NSK   | GSMMA   |
| ChPKS17   | (633) | GEIAAAYAVGATSAHDAIRIAYYRGLYVSLARSQDG-----    | KK    | MAV     |
| GmPKS10   | (632) | GEISAAAYAAGFLSLRDAIRVAYYRGVCAKLAGGVNG-----   | AP    | SMMAV   |
| af04917   | (661) | GEIGSAYAAGKISEVDAIKIAYYRGVYTKLAIGKDG-----    | KK    | GMLAV   |
| ncu08399  | (663) | GEIAAAYAAGKLSARDSILISYYRGKYAHLASGAQG-----    | SL    | GMMAA   |
| BfPKS6    | (638) | GEIGAAAYAAGRLTAGDAIRIAYYRGLHAHLAKGKGG-----   | EE    | SMMA    |
| BfPKS3    | (649) | GEIAAAYQSGCLSDAGI I IAYYRGLFARLACGADG-----   | C     | AGLMAV  |
| BfPKS4    | (629) | GEIAAAYFAGFLRSADAIRIAFYRGLHVARFISSCN-----    | Q     | EGRMLAA |
| AN8412    | (649) | GEIAAVYAAGIINADAAIKIAYYRGYAKLAAGARG-----     | Q     | AGRMMAT |
| mg09589   | (677) | GEMAALYAAGFLSLQDAVRIAYYRGLHASRLANDN-----     | G     | MLAV    |
| Syn8      | (680) | GEMAACYAAGILTLRDAVRIAYYRGRHA-RLARSS-----     | G     | MLAV    |
| ChPKS2    | (618) | GEVAAAYAAGLLSLPGAMRIAYARQQMAIRIKKVQP-----    | DF    | KGMLAV  |
| ChPKS1    | (656) | GEIAAAYAAGALSLSDAMLVAYARGCATANLAKKG-----     | AK    | GMAAV   |
| BfPKS8    | (637) | GEIGAAAYAAGILPLDSCMAIAYYRGLATVGLRKKFP-----   | DL    | RGSMAV  |
| LDKS      | (627) | GEAAAAYAIGALTARSAGISYIRGALTARDRLASVH-----    | K     | GMLAV   |
| ncu04865  | (669) | GEIAAAYAAGALDLASAMAIAFARGGLASEGNRQFAR-----   | K     | GMMAV   |
| FUM1      | (674) | GEMAAAYAAGAISSEEAIT IAYYRGYVNQQYTR-----      | D     | GMAVI   |
| ncu09638  | (656) | GEMAAAYAAGRITAAEAIVAAYFRGQAVSRNRQ-----       | T     | GMLAV   |
| ncu02918  | (630) | GEIAAAYTAGYLTPEQSI I IAYYRGHCVTKSTM-----     | V     | GMMAA   |
| AtMSAS    | (625) | GEIAASVAAGCLTAEEGALIVTRRANLYRRVMG-----       | A     | GMLV    |
| PgPKS2    | (630) | GEAAAAVVSGALTWHEGALVVCRRARLYREFIG-----       | E     | GMALV   |
| EpoD      | (620) | GELVAACVAGVFSLEDGVRLVAARGRLMQGLSAG-----      | G     | MVSL    |
| MxaC      | (616) | GEVVAAHVAGALSLEDAVLIICHRSKLMRTLGGRG-----     | A     | TAMAV   |
| MxaD      | (624) | GEVVAAHVAGTLSLEDAAKIICRRSRLLRSVSGQ-----      | G     | SMLLV   |
| pks ST    | (600) | GEYAALYISGVLSAADTLYLVGMRAKLLQERCQRG-----     | T     | HMLAV   |
| AnWA      | (627) | GDFAAAMNAAGVLSTSDTIYACGRRAQLLTERCQPG-----    | T     | HMLAI   |
| ClPKS1    | (622) | GEYAALNAAGVLSASDTIYLVGAR AQLLVQKCTAG-----    | T     | HMLAV   |
| Atat1     | (623) | GEYAALNVAGVLSASDAIYLVGRRAQLLEELCTPG-----     | S     | HKMLAI  |
| Consensus | (801) | GEIAAAYAAG LSA DAI IAYYR                     |       | GAMLAV  |

ACE1 (690) GTN-FEDAEELCEL-DDFKGRI CVAASNSAELVTLSGLDLDVQEVKKIL-  
 Syn7 (634) GMS-LDDAKDLVEL-EDFAGKVICIAASNSPDVTLSGLDLDAL EAVVEIL-  
 Syn6 (687) GCS-YKDAQELCGL-DMFRNRICVAASNAPDVTLSGLDADAI EAREVL-  
 LNKs (692) GMS-FEEAQELCEL-DAFEGRICVAASNSPDVTLSGDANAIDHLKGM-  
 GmPKS9 (693) GTD-EGDALEFCAL-EDNAGRITVAAVNAPSVTSLSGDEDAIEEAI VAF-  
 GmPKS1 (676) GTT-FDDASEFCAL-DAFQGRITQVAARNSSSITLSGLDADAI VEAIETF-  
 BfPKS5 (687) GTS-YEDALDFCEL-DDFVGRITQVAARNSSSITLSGLDADAI VQEAEEIF-  
 ChPKS16 (688) GTS-MEDATELRQN-EELLGRIGVAASNSSSVTSLSGDEDAINEVA AVL-  
 FG10464 (674) GTT-YEDAIELCQL-EDFRGRISLAAHNGPNSVTSLSGDSDAINQAHFIFS  
 mg03818 (669) PLS-YADACLCSQ-PRFQGRISVAASNPPGVTLSGLDQDAV EAEEL-  
 Syn2 (687) GTT-FADAQELCSL-PAFEGRACVAASNPA SVTSLSGDADAI EEIQIIL-  
 mg03810 (692) GIS-YAEALAVVGL-EQFQGRITAVAAHNSP SVTSLSGDEDAILEAKELL-  
 ChPKS17 (677) GLS-YEEACELCCEG--EFARRVDVAANSDT SVTSLSGDEDAILEIKARL-  
 GmPKS10 (676) GLS-YEEASVFCCE--NFHGLVDVAASNAP TSVTSLSGDKASIEEAKVLL-  
 af04917 (705) GFG-YEDGLNFCAM-EQFADRLTVAASNPPK SVTSLSGDLDVHEAKELL-  
 ncu08399 (707) GLT-KAEAEELCAL-PQFGRIVCVAASNPP SVTSLSGDLDIVQKVHDL-  
 BfPKS6 (682) GLS-FDEALEFCAG-EEYQKISIAASNAPKT VTLSGNKDAIEKAKSTL-  
 BfPKS3 (693) GLG-HAKASNFCRSR-KQFRGRIFVAASNAPQS TSLSGDCAV EDAFKTL-  
 BfPKS4 (673) GLS-QDAEDLLAA-TEFKGRISLAAVNPP SVTSLSGDADAI EEAQTQL-  
 AN8412 (693) AMS-FDEAEFCAL-PQWRGRILAAASNPPQ SVTSLSGDIDAI EEAQLF-  
 mg09589 (718) GLS-WDAARFCDG-DRFRGRILWRAAKNSP SVTSLSGDAGAV EAEAVL-  
 Syn8 (720) GLG-WDAEEQITAVQRWRGRILWLAARNPP SVTSLSGDADAVEEAEHAE-  
 ChPKS2 (663) AAGPADVLPPLLDIVTSG---KVVVIACENSPK SVTVSGDEAGLVELESLL-  
 ChPKS1 (699) SMETQELSHILSALENG---KVGIACFNSPT SCTVSGDKSALDELQDVL-  
 BfPKS8 (682) GCTKEEIEPLIDQLSAK---TARIA CFNSPSSLTISGDEPAIDELQALM-  
 LDKS (671) GLSRSEVGIYIRQVPLQSEECIVVGCNVSP SVTVSGDLSAI AKLEELL-  
 ncu04865 (713) GLGREAEKYLPRVTQG---QVVVACENSPTS TSLSGDVEGLVELEQIM-  
 FUM1 (714) GMGAQEVAPYIVVEG-----VGVACENSPQ SVTSLSGDKGVLEEVCKIK  
 ncu09638 (696) GLGPEAVAKYLSG----LEDQVKVAAINSPG SVTSLSGDPAAIDSKALA  
 ncu02918 (670) GLGAEDANKKISEL--DLVGKIRVACVNSP SVTSLSGDETEGIELRAQFD  
 AtMSAS (665) NIPFADMEKELQGR-----TDLVA AIDSPPSSCVSGATEAVLALVEDLK  
 PgPKS2 (670) RLPASEARARLATH-----LGASVAIEASPT VCVISGTIDAVQKISQ TWR  
 EpoD (660) GAPEAEVAAAVAP----HAAWVSI AAVNGPEVVIAGVEQAVQAIAAGFA  
 MxaC (657) ELSVEEAEAIRP----WNGKIWLGLNGPRS QVLSGEPEAVKEAVEALG  
 MxaD (664) DLTMEAKQALRG----FEDRVSVAVNSVRS TVLSGAPAAIEEISNNLK  
 pks ST (642) RASPVTLCVLAES-----NCEVACHNGPND TVLSGPKKEVMNLQNSLS  
 AnWA (669) KAPLVEVKQLLNEK-----VHDMACINSPSE TVISGPKSSIDELSRACS  
 ClPKS1 (664) TGPVDAVMEALGSQ----AEAINVACINGP RE TVLSGTAAKVSEISAQLG  
 Atat1 (665) AASVSVKEILGDKG---DKDIEVACINGPNET VISGPAEQMETYSKTLK  
 Consensus (851) GLS E A L F GRI VAA NSP SVTSLSGD DAI EL L

|           | 901   |                 | 914 |
|-----------|-------|-----------------|-----|
| ACE1      | (737) | DAE-EKFNKQLQVD  |     |
| Syn7      | (681) | QDE-GKFARLLRVD  |     |
| Syn6      | (734) | EDE-GKFARKVKVD  |     |
| LNKS      | (739) | EDE-STFARLLKVD  |     |
| GmPKS9    | (740) | QDE-GKFARLLKVD  |     |
| GmPKS1    | (723) | KDE-GKFARQLKVD  |     |
| BfPKS5    | (734) | KDE-GKFARALKVD  |     |
| ChPKS16   | (735) | EDE-KKFNRLKVD   |     |
| FG10464   | (722) | EEE-KKFARLLKVD  |     |
| mg03818   | (716) | KSQ-SIKAKRLFVD  |     |
| Syn2      | (734) | GEE-KKFNRLQVD   |     |
| mg03810   | (739) | TSD-GKFARLLRVD  |     |
| ChPKS17   | (723) | EDR-EVFARLLKVD  |     |
| GmPKS10   | (722) | DQQ-GTFARVLKVD  |     |
| af04917   | (752) | DAE-GVFNRLRLD   |     |
| ncu08399  | (754) | VDE-KKFARMLQVD  |     |
| BfPKS6    | (729) | DDR-GV FARVLKVD |     |
| BfPKS3    | (740) | KEE-GV FARILKVD |     |
| BfPKS4    | (720) | VSR-KIFNRLLNQ   |     |
| AN8412    | (740) | EAE-KKFARILRTD  |     |
| mg09589   | (765) | KAQ-NTTARRLKT   |     |
| Syn8      | (768) | QQR-GVFSRLRTG   |     |
| ChPKS2    | (709) | EED-GLPHRRLAVD  |     |
| ChPKS1    | (745) | RQK-GVYNRRLIVD  |     |
| BfPKS8    | (728) | EQK-QLFNRLQVD   |     |
| LDKS      | (720) | HAD-RIFARRLKVT  |     |
| ncu04865  | (759) | KEE-NIFARRLKVD  |     |
| FUM1      | (757) | EQVPDCFVRQLKVN  |     |
| ncu09638  | (742) | ADS--IFNRKLQTG  |     |
| ncu02918  | (718) | QAG--TFARVLKTD  |     |
| AtMSAS    | (710) | SRG--VNAFRVKTD  |     |
| PgPKS2    | (715) | EEG--TEVRPVATD  |     |
| EpoD      | (706) | ARG--VRTKRLHVS  |     |
| MxaC      | (703) | KRG--VFTRWVKMD  |     |
| MxaD      | (710) | QRD--VFCRFVKVD  |     |
| pks ST    | (686) | ATG--IKGTLKLP   |     |
| AnWA      | (713) | EKG--LKSTILTVP  |     |
| ClPKS1    | (710) | TSG--FKCTQLKVP  |     |
| Atat1     | (712) | ATD--IKCSLLSTA  |     |
| Consensus | (901) | E VFAR LKVD     |     |
