# Supplementary material
Source: PubMed Central journal article supplement (PMC520948)
Supplement: plntcell_tpc.104.022715_2.pdf [file plntcell_tpc.104.022715_2.pdf]

**Supplemental Figure 2.** Alignment of protein sequences of complete or truncated NRPS modules from fungal NRPS and PKS/NRPS. Protein sequences were aligned using AlignX. A similar alignment was obtained with ClustalW. The core sequences of the condensation (C) and adenylation (A) domains described by Marahiel et al. (1997) are indicated above the alignment by green lines. The following sequences were included in this analysis (see Methods for accession numbers): *M. grisea* (Ace1, Syn2, Syn6, Syn8, mg03810, mg03818, mg09589); *A. fumigatus* (af04917); *A. nidulans* (AN8412), *A. terreus* (LNKS); *C. heterostrophus* (ChPKS17), *B. fuckeliana* (BfPKS-3,5), *G. moniliformis* (GmPKS-1,9,10). Bacterial NRPS BbNRPS (CAD92852) and MxaA (AAK57184) and fungal NRPS AnACVS (EAA62968) and HC synthase (A45086) were added as references. For multimodular fungal and bacterial NRPS, numbers in brackets behind the enzyme name refer to the module that was included in this analysis.

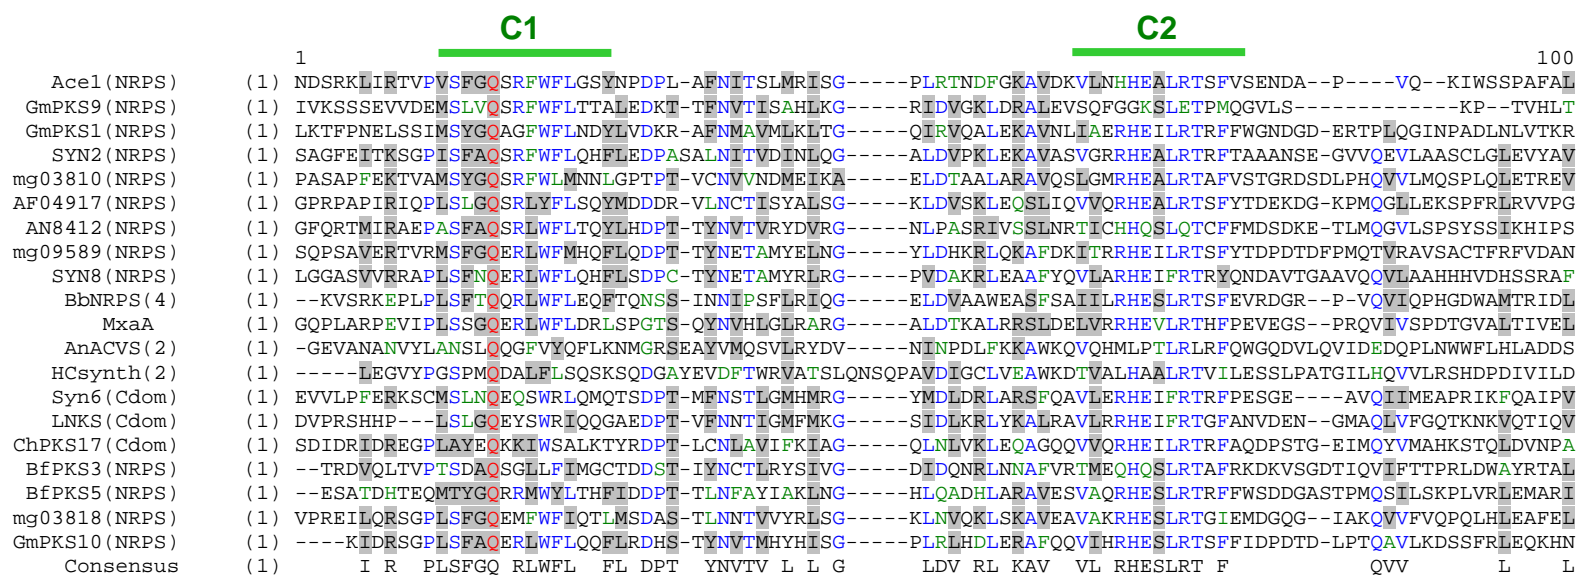

### C3

|                |       |                                                                                                     |     |
|----------------|-------|-----------------------------------------------------------------------------------------------------|-----|
|                | 101   |                                                                                                     | 200 |
| Ace1 (NRPS)    | (87)  | EQRKIADDESEV-----KAYTEVQNTRYNLEAGQTMRIMLLTKSPT-----KHVLVLGYHHINMDGVSFEVLFSDIEKAYNRTP-----LDRSV      |     |
| GmPKS9 (NRPS)  | (80)  | S--RHINSKEDVD-----EEMEWLHSHPWDLGGWETIKLSLLSQSDT-----EHWLVLAFFHHIAFDGYSLEIFWSDLAKAYNANGSIPTLPDAKQY   |     |
| GmPKS1 (NRPS)  | (94)  | VVDEGEAEMELK-----KLHDEWDLSGGEGVKITLLSLSDN-----VHFLLLGMHHIYIDGYSFVSFFKDLEVAYTKHALP-----SLPVE         |     |
| SYN2 (NRPS)    | (95)  | KGAADADAFYK-----ALSAHRYRLDRGENMRIVLLRMSPK-----SFRLLIQYHHINMDGVSLEVVLOELQLQGYSGRALK-----PESQI        |     |
| mg03810 (NRPS) | (95)  | QSLDEVDRLYH-----ELHHAQFNLETGELVKMVLASLPSGQ-----VHLLIIGYHHINMDSFMAILMSELLQLYAGT-----VLEPRT           |     |
| AF04917 (NRPS) | (94)  | VSASSDVETEFN-----LTRYRYPDLEQADTFEATLLSHSPD-----SHTLICGYHHIIMDGVSWQIFQKDLAMFYNNNG--IADSAKHL          |     |
| AN8412 (NRPS)  | (94)  | GSEQTVREEYN-----RLRSRVWDLQAGETFAVTVVSLSPE-----QHTLIIFGYHHIVMDGVSWHLFLRDLDLAYRLRP-----LPSIE          |     |
| mg09589 (NRPS) | (95)  | GGFDEHANVIDS-----EYKATRERHWDLENGVCVTGLIRLTHD-----RHMFIIGSHHIVMDGMTWILLRDLRSREYELDGGPASIPSP--P       |     |
| SYN8 (NRPS)    | (95)  | RSVDATHEKGEQRQTIIETEFDAMVNRKVALSTGASIGMTLIVLPSSSSSSPHRPEHVLILGAHHIADVDTTWTIFFRDLDRAYTAGRLS-----PSAG |     |
| BbNRPS (4)     | (90)  | RALEPAEREAIEK-----RLAEQAIVQPFDLTKGLLLRASLVQLDAN-----DFVFLFVMMHIIASDGSWGMILLSELMNTYKAFRQGEASPLGELP   |     |
| MxaA           | (93)  | PGLTESQREEEIY-----RRSDELAQQPFDLAKGPLLRLVTVLALGPD-----DFALFVTKHHIITDGSWLVGFVRELSMLYASFVRGQAALPPVS    |     |
| AnACVS (2)     | (95)  | ALPEEQKLELQR-----RDLAEPYDLAAGSLFRYIYLIEHSSTR-----FSCLFSCHHAILDGSWLPPLFRKTHGTYLHLLHG-----HS          |     |
| HCsynth (2)    | (96)  | VRDVTAAITILDS-----YPPTEEGIALIKRPHRLLICTTIEG-----SVLTKFQVNHVFDGMSYTDKIIQDLKAYTCRHSNKLDPHSESK         |     |
| Syn6 (Cdom)    | (91)  | ADKASAEQG-----FKVDGQSYNLAAGETLKLIDFWASD-----EHMLIIAYNPLVCDGWTYERFFVLSQIYDYGK-----SLPP-V             |     |
| LNKS (Cdom)    | (90)  | SDRAGAEEG-----YRQLVQTRYNPAAGDTRLRLVDFWQD-----DHLLVVAYHRLVCGDSTTENIFVEAGQLYDGT-----SLSPHV            |     |
| ChPKS17 (Cdom) | (94)  | ITPQEAFAVAVR-----SHTFDLNAGETMKAITVPHEDH-----IYLAIAWHHLAFDGFSPVPPFLKDLNITYFGGTLF-----P               |     |
| BfPKS3 (NRPS)  | (93)  | SEEEALLEFSDMK-----KRNVDIESGRTMAATLLSFGHD-----SHQLILGYHHLIMDFVSLRIFFEQVRNYNNQIP-----VTTS             |     |
| BfPKS5 (NRPS)  | (93)  | PKELALEAAEAEL-----N--AMRNFWDLEAGYPCDFDYFTLSDT-----EHYLLMGSHHITLDGHSFTIMMMDIEEAYLSPGQQ--IPALPQS      |     |
| mg03818 (NRPS) | (93)  | PEGLACTIRG-----LEEHKYDVENGKSVRIIVASTST-----EHHLIGFHHINMDGISLQVLLSELDCAVYRGDP-----LNGSP              |     |
| GmPKS10 (NRPS) | (90)  | STAKIEYKAMQG-----MSYDLENGNVVKAIVIPDSDG-----EFDLIFGFHHIALDGYSAQIMVRLDAMIYAGQTLN-----SKQ              |     |
| Consensus      | (101) | L YDL G TLRI LLS S H LIIGYHHI MDG S ILL DL Y G                                                      |     |

### C4

|                |       |                                                                                                   |     |
|----------------|-------|---------------------------------------------------------------------------------------------------|-----|
|                |       |                                                                                                   | 300 |
| Ace1 (NRPS)    | (167) | MQFPDFTI-----REAGEYKSGAWRSELQYWQSKFTS-L--PEPTPLLSVSKRRTRPVNLSYTT-----HSVSRRINAEQSQAIHTVGRKFK      |     |
| GmPKS9 (NRPS)  | (164) | RAYIAKQ-----RRQNLSKPFQWRKAIEYRKLIMP-E--PEPLPLLPFAKVSHRKLLDNYSCYN-----AEITLPESEARIRKLAKANH         |     |
| GmPKS1 (NRPS)  | (171) | SQYRSFAL-----QQRQMYANGDLTKSIEYRRSFPK-E--FTPIQLFPFALTPARQFANDYS-----QHEVKMSTDELATKVRQLARVNR        |     |
| SYN2 (NRPS)    | (171) | LQYPDFSR-----QQHLDYDSGRLADDLAFWRSEFRG-Q--APPVLPPLPLAKIQSRKPLTTY-----TTTTEFCLDEEEMHKIQAVCQMLK      |     |
| mg03810 (NRPS) | (170) | LQQSDLAL-----YEQDQLRSQKWARELAFWRRLSAENPTLHEPLPILHLSPPSSTTRARPDRIAYRAQVR-----SRRISAATAQRLRSLCRHVG  |     |
| AF04917 (NRPS) | (173) | AQYSEFTR-----KQQEDLSCGAYAERLRFQDQFRE-P--VESLPLFPFAKVGTRKVKVQYAVQ-----EATTHLNAKVVSAIKQASQTSR       |     |
| AN8412 (NRPS)  | (168) | MEYIDWSK-----KQFQSAQRGDFTRPLEYWRKQHSR-P--PSVMPLLPMAQTSRKKPLTSYDS-----HVISVQIDRQLVSHIRLVSQSLG      |     |
| mg09589 (NRPS) | (178) | LQYADFV-----RQRHLVEEGRFADDVRFWAQEVGH-RG--SMAMP LLPMARVSTRQPTDSYKN-----ATSERMLTSVLVSSVRRASSSLQ     |     |
| SYN8 (NRPS)    | (190) | PQYADFAM-----QQR--SKTPANHGADMEFWSAELSG-LP--SEPIPLFPQAKTTRRAPLDRYGS-----VTARCLDAAAASEVKRTSARLH     |     |
| BbNRPS (4)     | (176) | IQYADFV-----WQREWLSGEVLAELQGYWRREKLGK-S--EPLQLPTDRPRPPVQTYEGE-----KMSVQFGAELLKQLQSLSRKEG          |     |
| MxaA           | (179) | MQFADSAL-----RERAWLAGESGARERAYWKGKLGK---LPPQLQVPDHAVSTSTSHRGA-----TVPLALSPALSDALRELAAREG          |     |
| AnACVS (2)     | (170) | LRTLEDY-----RQSQYQLQDHREDHLRYWAGIVNQIEERCMDNALLNERSRYKIQADYDKVED-----QQQLTLTVPDASWLSKLRQTCQAQG    |     |
| HCsynth (2)    | (180) | LHDGTYGNRPTKPLAEFIRYIRDPQRKQDSINWKNALRG-----ATTCSPPLDFDQITSEKAMPRQS-----WASVPIPLCVDKSKLTLANLG     |     |
| Syn6 (Cdom)    | (164) | PQYADFAT-----RQRTSYETGAMDADLYWKSVMHK-----TLPEPLPVFVSSGASGPKPSPAWDQHTLDARLSSATAARIQDIARSSK         |     |
| LNKS (Cdom)    | (164) | PQFADLAA-----RQAMLEDGRMELEAYWKLPMHYR-P--SSIPVLPMLRPLVGNSSRSDTPNFQHCQGPWQHEAVARLDPVMVAFRIKERSRKHK  |     |
| ChPKS17 (Cdom) | (162) | LKYQYLDLDF-----VNDQLRKTGQVKDRLAYWTSEYRHLR---STLPLFPFSKTEVRPMMLSQRPKPR-----PTVEKTLHVQLCAAVKSVSRKIG |     |
| BfPKS3 (NRPS)  | (166) | TQYSEFVI-----HQTKILSSSTARSDKSYLQEFAD-P--PSPVPLLPMAARSQFRSLPQYKICAS-----EIAITHRLKQLIREVGSSSK       |     |
| BfPKS5 (NRPS)  | (174) | SQARAFSE-----QTRLAYESGGFAKALDFYRRIPLPP-QDFLHLELFPFARTQVRPPQWQS-----HVVQRVLDPSITVTLNQIARRH         |     |
| mg03818 (NRPS) | (166) | LQFVDFSR-----LQDQALEKGEWDCHLEFWRNRLAD-P--PAQLPLPLPNAAKRLCPLEVEYR-----TTEVEARLEPSTVRMVHERCQRRL     |     |
| GmPKS10 (NRPS) | (161) | QDYLDFAI-----AQKAAKVP--YTTLAYWRSELED-L--PPTLTVDFDAETKTRIPLTDYTR-----ALERRLSIEQSRISIKAVAKRLD       |     |
| Consensus      | (201) | LQY DFA RQR G L YWR L LPL P A R V L LA IR VSR                                                     |     |

## C5

## C6

301

|                |       |                                                                                                                                                                                                                                                                                                                                                                                                                                                                                                                                           |
|----------------|-------|-------------------------------------------------------------------------------------------------------------------------------------------------------------------------------------------------------------------------------------------------------------------------------------------------------------------------------------------------------------------------------------------------------------------------------------------------------------------------------------------------------------------------------------------|
| Ace1 (NRPS)    | (246) | ATPFH <b>F</b> YLS <b>V</b> F <b>K</b> T <b>L</b> IAR <b>F</b> SG---AD <b>DF</b> CIGI <b>I</b> ADAN <b>R</b> KED-----KVMGAV <b>G</b> LY <b>L</b> N <b>L</b> PL <b>R</b> VR--SALGQ---TF <b>G</b> ET <b>L</b> ADM <b>K</b> K <b>V</b> S <b>Q</b> E <b>A</b> F <b>A</b> N <b>S</b> K <b>V</b> P <b>F</b> D <b>V</b> L <b>L</b>                                                                                                                                                                                                               |
| GmPKS9 (NRPS)  | (242) | ST <b>S</b> F <b>H</b> V <b>V</b> Y <b>A</b> S <b>L</b> Q <b>T</b> L <b>L</b> F <b>G</b> L <b>M</b> P <b>D</b> S--V <b>D</b> R <b>L</b> F <b>I</b> AM <b>D</b> D <b>T</b> N <b>R</b> L <b>D</b> K-----DFMD <b>T</b> I <b>G</b> LF <b>V</b> N <b>T</b> LF <b>L</b> R <b>F</b> DRAD <b>Y</b> N <b>K</b> L---SL <b>S</b> DA <b>V</b> KA <b>A</b> R <b>T</b> K <b>T</b> Y <b>K</b> AL <b>E</b> H <b>S</b> V <b>L</b> PL <b>D</b> V <b>L</b> L                                                                                                 |
| GmPKS1 (NRPS)  | (250) | ST <b>S</b> F <b>H</b> V <b>Y</b> LA <b>A</b> LE <b>L</b> L <b>L</b> F <b>T</b> LL <b>P</b> N--A <b>E</b> EV <b>F</b> I <b>G</b> IADAN <b>R</b> G <b>D</b> K-----K <b>F</b> M <b>G</b> S <b>L</b> G <b>F</b> F <b>L</b> N <b>L</b> PL <b>R</b> F <b>R</b> --R <b>K</b> R <b>R</b> G <b>T</b> ---Q <b>L</b> S <b>S</b> I <b>I</b> Q <b>T</b> AR <b>D</b> T <b>A</b> Y <b>G</b> AL <b>Q</b> H <b>S</b> Q <b>L</b> P <b>F</b> D <b>V</b> L <b>L</b>                                                                                          |
| SYN2 (NRPS)    | (251) | V <b>S</b> P <b>F</b> H <b>F</b> HL <b>A</b> I <b>F</b> Y <b>T</b> LL <b>A</b> R <b>L</b> VD--V <b>D</b> DL <b>C</b> I <b>G</b> V <b>S</b> S <b>A</b> N <b>R</b> Q <b>T</b> P-----E <b>T</b> M <b>S</b> S <b>V</b> G <b>M</b> Y <b>L</b> N <b>L</b> PL <b>V</b> F <b>K</b> --V <b>D</b> R <b>S</b> H---T <b>F</b> AN <b>A</b> I <b>K</b> M <b>I</b> R <b>A</b> K <b>A</b> LA <b>F</b> S <b>H</b> AA <b>V</b> P <b>F</b> DL <b>M</b> I                                                                                                     |
| mg03810 (NRPS) | (255) | V <b>T</b> PF <b>H</b> V <b>Y</b> T <b>T</b> V <b>L</b> Q <b>V</b> L <b>I</b> TRL <b>A</b> Q---V <b>Q</b> R <b>V</b> T <b>V</b> G <b>M</b> AD <b>N</b> R <b>G</b> S--L <b>H</b> L <b>P</b> G <b>A</b> D <b>G</b> AV <b>G</b> N <b>F</b> L <b>N</b> M <b>V</b> PL <b>F</b> L <b>G</b> ---S <b>P</b> P <b>R</b> --D <b>H</b> T <b>I</b> Y <b>M</b> L <b>L</b> C <b>Q</b> T <b>R</b> D <b>V</b> V <b>L</b> E <b>A</b> I <b>S</b> N <b>A</b> S <b>V</b> P <b>I</b> E <b>L</b> I <b>T</b>                                                      |
| AF04917 (NRPS) | (252) | T <b>T</b> PF <b>H</b> F <b>Y</b> L <b>S</b> A <b>F</b> Q <b>V</b> LL <b>H</b> R <b>L</b> LE---T <b>D</b> K <b>M</b> C <b>I</b> G <b>V</b> V <b>D</b> AN <b>R</b> S <b>D</b> Q-----N <b>F</b> V <b>N</b> T <b>I</b> G <b>F</b> F <b>L</b> E <b>T</b> I <b>P</b> L <b>W</b> F <b>K</b> --V <b>N</b> S <b>E</b> Q---R <b>F</b> V <b>E</b> L <b>L</b> K <b>E</b> T <b>R</b> T <b>K</b> Y <b>A</b> AL <b>A</b> Q <b>T</b> G <b>V</b> P <b>T</b> E <b>E</b> L <b>L</b>                                                                         |
| AN8412 (NRPS)  | (247) | V <b>T</b> PF <b>H</b> F <b>H</b> L <b>A</b> V <b>I</b> Q <b>S</b> I <b>L</b> C <b>R</b> LL <b>K</b> ---T <b>E</b> DL <b>T</b> C <b>I</b> G <b>V</b> V <b>D</b> AN <b>R</b> T <b>S</b> E-----A <b>H</b> S <b>G</b> T <b>V</b> G <b>F</b> F <b>L</b> N <b>L</b> PL <b>V</b> R <b>F</b> T--T <b>R</b> E <b>H</b> S---T <b>F</b> Q <b>D</b> L <b>V</b> S <b>S</b> T <b>K</b> R <b>T</b> I <b>L</b> G <b>A</b> I <b>S</b> N <b>S</b> E <b>A</b> P <b>F</b> DL <b>L</b> I <b>L</b>                                                             |
| mg09589 (NRPS) | (258) | I <b>T</b> PF <b>H</b> F <b>H</b> L <b>G</b> V <b>L</b> A <b>I</b> L <b>V</b> C <b>R</b> LS <b>R</b> ---M <b>D</b> E <b>V</b> C <b>I</b> G <b>I</b> C <b>D</b> S <b>G</b> R <b>G</b> M <b>R</b> N <b>E</b> G <b>E</b> P <b>D</b> F <b>S</b> G <b>T</b> A <b>G</b> F <b>F</b> I <b>N</b> F <b>A</b> P <b>I</b> V <b>L</b> S <b>I</b> S <b>P</b> D <b>G</b> D <b>Q</b> S <b>Q</b> N <b>T</b> F <b>A</b> A <b>L</b> S <b>K</b> R <b>V</b> S <b>S</b> K <b>A</b> F <b>A</b> L <b>S</b> H <b>A</b> G <b>V</b> P <b>F</b> D <b>A</b> L <b>L</b> |
| SYN8 (NRPS)    | (269) | M <b>T</b> A <b>F</b> G <b>L</b> H <b>M</b> A <b>V</b> L <b>S</b> V <b>L</b> V <b>S</b> H <b>L</b> S <b>G</b> ---T <b>S</b> DL <b>C</b> I <b>G</b> F <b>C</b> D <b>G</b> R <b>P</b> DA-----F <b>A</b> E <b>T</b> A <b>G</b> F <b>F</b> V <b>N</b> M <b>L</b> P <b>V</b> R <b>L</b> D <b>T</b> A <b>A</b> R <b>H</b> A <b>G</b> --P <b>A</b> S <b>F</b> A <b>D</b> L <b>A</b> R <b>A</b> T <b>F</b> A <b>K</b> L <b>M</b> D <b>V</b> M <b>A</b> H <b>S</b> S <b>L</b> S <b>L</b> E <b>A</b> L <b>L</b>                                     |
| BbNRPS (4)     | (252) | A <b>T</b> L <b>F</b> M <b>T</b> L <b>F</b> A <b>A</b> F <b>Q</b> T <b>L</b> L <b>R</b> Y <b>T</b> N---Q <b>D</b> IL <b>V</b> G <b>T</b> P <b>I</b> A <b>G</b> R <b>N</b> K <b>Q</b> -----E <b>T</b> E <b>Q</b> L <b>I</b> G <b>Y</b> F <b>I</b> N <b>T</b> L <b>V</b> L <b>R</b> T--D <b>M</b> S <b>G</b> H <b>P</b> ---S <b>F</b> R <b>E</b> L <b>L</b> A <b>R</b> V <b>R</b> E <b>T</b> A <b>L</b> E <b>A</b> Y <b>A</b> H <b>Q</b> D <b>V</b> P <b>F</b> E <b>K</b> L <b>L</b>                                                        |
| MxaA           | (254) | C <b>S</b> F <b>F</b> T <b>V</b> L <b>F</b> A <b>A</b> F <b>S</b> A <b>L</b> L <b>H</b> R <b>Y</b> S <b>G</b> ---Q <b>V</b> D <b>F</b> G <b>V</b> G <b>T</b> V <b>I</b> A <b>N</b> R <b>G</b> S-----V <b>P</b> AD <b>L</b> I <b>G</b> F <b>I</b> A <b>N</b> T <b>L</b> L <b>R</b> C--D <b>L</b> S <b>G</b> E <b>P</b> ---T <b>F</b> S <b>Q</b> W <b>L</b> A <b>R</b> A <b>H</b> K <b>V</b> V <b>L</b> E <b>A</b> L <b>D</b> Y <b>Q</b> A <b>L</b> P <b>F</b> S <b>E</b> V <b>V</b>                                                        |
| AnACVS (2)     | (256) | I <b>T</b> L <b>H</b> S <b>I</b> L <b>Q</b> F <b>V</b> H <b>A</b> V <b>L</b> H <b>A</b> Y <b>G</b> G---G <b>T</b> H <b>T</b> V <b>G</b> T <b>T</b> I <b>S</b> G <b>R</b> N <b>L</b> P <b>V</b> S <b>G</b> ---I <b>E</b> R <b>S</b> V <b>G</b> L <b>Y</b> I <b>N</b> T <b>L</b> P <b>L</b> V <b>I</b> N---Q <b>L</b> A-----Y---K <b>N</b> K <b>T</b> V <b>L</b> E <b>A</b> I <b>R</b> D <b>V</b> Q <b>A</b> I <b>V</b> N <b>G</b> M <b>N</b>                                                                                               |
| HCsynth (2)    | (267) | I <b>T</b> M <b>S</b> T <b>M</b> F <b>Q</b> T <b>V</b> W <b>A</b> I <b>V</b> L <b>R</b> I <b>Y</b> S <b>Q</b> ---N <b>G</b> Q <b>S</b> V <b>F</b> G <b>Y</b> L <b>T</b> S <b>G</b> R <b>D</b> A <b>P</b> V <b>D</b> G---I <b>D</b> S <b>A</b> V <b>G</b> N <b>F</b> I <b>A</b> M <b>L</b> V <b>C</b> F <b>F</b> D <b>F</b> D <b>D</b> D <b>G</b> V <b>H</b> ---T <b>V</b> A <b>D</b> M <b>A</b> R <b>K</b> I <b>H</b> N <b>A</b> S <b>A</b> N <b>S</b> I <b>S</b> H <b>Q</b> A <b>C</b> S <b>L</b> A <b>E</b> I <b>Q</b>                  |
| Syn6 (Cdom)    | (246) | V <b>T</b> P <b>M</b> Q <b>F</b> Y <b>L</b> A <b>S</b> Y <b>V</b> Y <b>L</b> S <b>R</b> L <b>T</b> G---R <b>A</b> D <b>V</b> A <b>I</b> G <b>V</b> A <b>D</b> A <b>N</b> R <b>P</b> D <b>L</b> -----D <b>D</b> L <b>S</b> T <b>M</b> G <b>L</b> F <b>V</b> N <b>T</b> PL <b>R</b> L--D <b>H</b> A <b>A</b> H <b>D</b> ---T <b>F</b> A <b>S</b> T <b>L</b> S <b>R</b> T <b>K</b> E <b>F</b> M <b>R</b> R <b>A</b> T <b>L</b> H <b>S</b> R <b>V</b> P <b>M</b> H <b>V</b> I <b>L</b>                                                        |
| LNKS (Cdom)    | (252) | A <b>T</b> P <b>M</b> Q <b>F</b> Y <b>L</b> A <b>A</b> Y <b>Q</b> V <b>L</b> L <b>A</b> R <b>L</b> T <b>D</b> ---S <b>T</b> D <b>L</b> T <b>V</b> G <b>L</b> A <b>D</b> T <b>N</b> R <b>A</b> T <b>V</b> ---D <b>E</b> M <b>A</b> A <b>M</b> G <b>F</b> F <b>V</b> N <b>L</b> P <b>L</b> R <b>F</b> R--D <b>F</b> R <b>P</b> H <b>I</b> ---T <b>F</b> G <b>E</b> H <b>L</b> I <b>A</b> T <b>R</b> D <b>L</b> V <b>R</b> E <b>A</b> L <b>Q</b> H <b>A</b> R <b>V</b> P <b>Y</b> G <b>V</b> L <b>L</b>                                      |
| ChPKS17 (Cdom) | (244) | A <b>T</b> PF <b>H</b> V <b>Y</b> LA <b>A</b> L <b>Q</b> V <b>L</b> F <b>Y</b> R <b>M</b> L <b>S</b> ---V <b>Q</b> D <b>V</b> C <b>L</b> A <b>I</b> Q <b>V</b> N <b>N</b> R <b>E</b> A <b>E</b> -----F <b>D</b> D <b>N</b> I <b>G</b> E <b>F</b> G <b>L</b> L <b>P</b> I <b>K</b> L <b>Q</b> ---T <b>Q</b> D---N <b>F</b> A <b>Q</b> L <b>V</b> R <b>H</b> R <b>D</b> K <b>T</b> Q <b>E</b> G <b>L</b> Q--A <b>I</b> V <b>P</b> L <b>Q</b> S <b>I</b> M                                                                                   |
| BfPKS3 (NRPS)  | (245) | C <b>T</b> PF <b>H</b> F <b>Y</b> L <b>A</b> S <b>L</b> Q <b>V</b> LL <b>A</b> R <b>T</b> T <b>G</b> ---V <b>E</b> DF <b>C</b> I <b>G</b> I <b>G</b> D <b>A</b> N <b>R</b> A <b>D</b> P-----K <b>F</b> L <b>D</b> T <b>I</b> G <b>L</b> V <b>M</b> E <b>L</b> V <b>P</b> L <b>R</b> F <b>Q</b> --Y <b>G</b> S <b>L</b> D---T <b>F</b> S <b>K</b> V <b>M</b> C <b>D</b> T <b>R</b> Q <b>V</b> L <b>A</b> A <b>L</b> S <b>H</b> V <b>S</b> T <b>P</b> Y <b>H</b> V <b>A</b> L                                                               |
| BfPKS5 (NRPS)  | (254) | ST <b>S</b> F <b>H</b> Y <b>L</b> A <b>S</b> Y <b>Q</b> A <b>M</b> L <b>F</b> R <b>L</b> L <b>P</b> S <b>N</b> T <b>D</b> K <b>L</b> F <b>I</b> G <b>M</b> A <b>D</b> A <b>N</b> R <b>L</b> D <b>S</b> -----K <b>F</b> L <b>R</b> S <b>I</b> G <b>N</b> F <b>L</b> N <b>L</b> PL <b>R</b> F <b>D</b> --R <b>A</b> T <b>R</b> Q---S <b>F</b> G <b>D</b> A <b>I</b> E <b>F</b> A <b>R</b> A <b>K</b> T <b>H</b> T <b>A</b> L <b>E</b> H <b>S</b> A <b>L</b> P <b>F</b> E <b>L</b> L <b>L</b>                                                |
| mg03818 (NRPS) | (246) | V <b>T</b> PF <b>C</b> F <b>Y</b> L <b>G</b> V <b>F</b> R <b>V</b> LL <b>A</b> R <b>L</b> A <b>N</b> ---I <b>N</b> DF <b>C</b> I <b>G</b> I <b>A</b> D <b>A</b> N <b>R</b> L <b>D</b> G-----D <b>M</b> L <b>D</b> A <b>V</b> G <b>M</b> Y <b>L</b> N <b>L</b> PL <b>R</b> F <b>R</b> --T <b>S</b> G <b>G</b> E---T <b>F</b> E <b>D</b> I <b>S</b> Q <b>N</b> T <b>K</b> D <b>T</b> I <b>R</b> E <b>S</b> L <b>E</b> H <b>S</b> A <b>V</b> P <b>F</b> G <b>V</b> M <b>L</b>                                                                |
| GmPKS10 (NRPS) | (237) | V <b>T</b> PF <b>H</b> LA <b>T</b> L <b>Q</b> V <b>L</b> S <b>D</b> LA <b>S</b> ---A <b>N</b> D <b>L</b> C <b>I</b> G <b>I</b> T <b>D</b> A <b>N</b> K <b>N</b> D <b>A</b> -----T <b>H</b> I <b>D</b> T <b>V</b> G <b>F</b> F <b>V</b> N <b>L</b> PL <b>R</b> L <b>R</b> K--L <b>S</b> S <b>S</b> Q---T <b>L</b> A <b>D</b> L <b>V</b> A <b>N</b> A <b>K</b> S <b>K</b> A <b>N</b> G <b>A</b> L <b>S</b> H <b>S</b> D <b>M</b> P <b>F</b> D <b>V</b> L <b>L</b>                                                                           |
| Consensus      | (301) | V <b>T</b> PF <b>H</b> Y <b>L</b> A <b>A</b> F <b>Q</b> V <b>L</b> L R <b>L</b> D <b>D</b> L <b>C</b> I <b>G</b> I D <b>A</b> N <b>R</b> D M <b>T</b> V <b>G</b> F <b>L</b> N <b>L</b> L <b>P</b> L <b>R</b> F <b>T</b> F <b>A</b> D <b>L</b> L R <b>K</b> A <b>L</b> S <b>H</b> S <b>V</b> P <b>F</b> D <b>V</b> L <b>L</b>                                                                                                                                                                                                              |

## C6

## C7

500

|                |       |                                                                                                                                                                                                                                                                                                                                                                                                                                                                                                                                |
|----------------|-------|--------------------------------------------------------------------------------------------------------------------------------------------------------------------------------------------------------------------------------------------------------------------------------------------------------------------------------------------------------------------------------------------------------------------------------------------------------------------------------------------------------------------------------|
| Ace1 (NRPS)    | (333) | N <b>E</b> L <b>S</b> V <b>P</b> R <b>S</b> S <b>Q</b> -----T <b>P</b> L <b>F</b> Q <b>T</b> F <b>V</b> N <b>Y</b> R <b>R</b> G <b>V</b> S <b>E</b> R <b>S</b> ---F <b>C</b> G <b>C</b> T <b>G</b> A <b>G</b> E <b>L</b> I <b>S</b> G <b>G</b> Q-----I <b>G</b> Y <b>D</b> I <b>S</b> L <b>D</b> I <b>V</b> E <b>N</b> P <b>G</b> D <b>A</b> L <b>V</b> T <b>L</b> S <b>V</b> Q <b>K</b> D <b>L</b> Y <b>N</b> V <b>D</b> M <b>A</b> N <b>L</b> L <b>L</b> D <b>S</b> F <b>Y</b>                                               |
| GmPKS9 (NRPS)  | (333) | K <b>E</b> L <b>C</b> I <b>T</b> R <b>H</b> G <b>D</b> A <b>V</b> P-----V <b>A</b> Q <b>V</b> L <b>I</b> D <b>Y</b> R <b>V</b> S <b>H</b> K <b>E</b> W <b>F</b> R---L <b>G</b> D <b>C</b> R <b>A</b> E <b>M</b> G <b>T</b> G <b>R</b> A <b>E</b> R <b>Q</b> --G <b>S</b> D <b>L</b> A <b>F</b> Y <b>I</b> L <b>D</b> D <b>S</b> D <b>E</b> Q <b>N</b> G <b>R</b> V <b>R</b> V <b>G</b> V <b>E</b> V <b>Q</b> S <b>T</b> L <b>Y</b> D <b>A</b> E <b>H</b> A <b>E</b> M <b>L</b> I <b>K</b> A <b>Y</b> A                         |
| GmPKS1 (NRPS)  | (339) | R <b>E</b> L <b>N</b> V <b>P</b> R <b>S</b> D <b>K</b> Y <b>T</b> ---P <b>I</b> F <b>Q</b> V <b>F</b> M <b>D</b> Y <b>R</b> Q <b>V</b> Q <b>E</b> R <b>S</b> S---W <b>G</b> C <b>R</b> L <b>H</b> G <b>E</b> K <b>W</b> H <b>N</b> A <b>G</b> -----T <b>G</b> Y <b>D</b> I <b>A</b> L <b>E</b> V <b>N</b> E <b>N</b> I <b>T</b> D <b>T</b> L <b>L</b> G <b>L</b> R <b>L</b> Q <b>E</b> Q <b>L</b> Y <b>S</b> E <b>H</b> T <b>A</b> L <b>L</b> L <b>R</b> S <b>Y</b> L                                                          |
| SYN2 (NRPS)    | (338) | K <b>D</b> L <b>G</b> V <b>A</b> G <b>T</b> S <b>S</b> H <b>S</b> ---P <b>V</b> F <b>Q</b> A <b>M</b> V <b>N</b> Y <b>R</b> P <b>G</b> V <b>S</b> T <b>A</b> R <b>R</b> ---F <b>C</b> D <b>C</b> D <b>S</b> E <b>V</b> A <b>T</b> F <b>F</b> K <b>Q</b> E-----V <b>P</b> Y <b>D</b> L <b>A</b> F <b>D</b> I <b>M</b> E <b>N</b> P <b>G</b> G <b>S</b> S <b>L</b> I <b>M</b> L <b>T</b> G <b>Q</b> S <b>V</b> Y <b>G</b> K <b>T</b> E <b>M</b> E <b>H</b> I <b>K</b> G <b>Y</b> L                                               |
| mg03810 (NRPS) | (346) | E <b>Q</b> T <b>G</b> A <b>P</b> K <b>N</b> P <b>S</b> C <b>S</b> ---P <b>L</b> F <b>Q</b> V <b>F</b> I <b>D</b> Y <b>K</b> R <b>V</b> T <b>E</b> T <b>L</b> P <b>L</b> P-----E <b>G</b> K <b>G</b> T <b>V</b> Q <b>G</b> S <b>R</b> Y <b>L</b> L <b>S</b> K <b>T</b> P <b>Y</b> D <b>I</b> M <b>L</b> D <b>V</b> I <b>D</b> T <b>P</b> A <b>G</b> D <b>A</b> L <b>L</b> Q <b>L</b> H <b>A</b> Q <b>D</b> G <b>L</b> Y <b>T</b> S <b>E</b> S <b>A</b> R <b>L</b> L <b>D</b> L <b>Y</b> S                                       |
| AF04917 (NRPS) | (339) | R <b>A</b> C <b>G</b> V <b>A</b> S <b>S</b> T <b>T</b> E <b>T</b> ---P <b>L</b> F <b>Q</b> V <b>F</b> C <b>F</b> N <b>Y</b> R <b>M</b> G <b>A</b> R <b>T</b> A <b>A</b> ---L <b>Q</b> G <b>V</b> E <b>M</b> K <b>F</b> L <b>D</b> Y <b>V</b> D <b>A</b> Q <b>N</b> ---P <b>F</b> D <b>L</b> V <b>A</b> T <b>V</b> D <b>D</b> L <b>D</b> D <b>G</b> T <b>A</b> M <b>I</b> T <b>L</b> Y <b>L</b> Q <b>D</b> Y <b>L</b> Y <b>D</b> Q <b>E</b> G <b>A</b> Q <b>L</b> L <b>A</b> T <b>M</b> Y <b>A</b>                              |
| AN8412 (NRPS)  | (334) | E <b>D</b> L <b>K</b> V <b>L</b> R <b>S</b> I <b>E</b> H <b>S</b> ---P <b>L</b> F <b>Q</b> V <b>A</b> V <b>N</b> Y <b>R</b> M <b>G</b> A <b>M</b> L <b>Q</b> V <b>P</b> ---L <b>G</b> D <b>G</b> T <b>M</b> E <b>V</b> A <b>A</b> A <b>D</b> D <b>A</b> K <b>N</b> ---P <b>Y</b> D <b>L</b> S <b>F</b> G <b>I</b> T <b>E</b> T <b>S</b> T <b>C</b> T <b>L</b> L <b>E</b> L <b>T</b> S <b>Q</b> K <b>Q</b> L <b>Y</b> T <b>E</b> Q <b>S</b> T <b>E</b> L <b>L</b> Q <b>M</b> Y <b>M</b>                                         |
| mg09589 (NRPS) | (355) | D <b>Q</b> L <b>K</b> V <b>P</b> R <b>T</b> S <b>R</b> H <b>S</b> ---P <b>L</b> F <b>Q</b> V <b>V</b> I <b>N</b> Y <b>R</b> L <b>G</b> A <b>L</b> S <b>H</b> G <b>D</b> ---I <b>A</b> G <b>C</b> Q <b>V</b> K <b>Y</b> V <b>R</b> S <b>H</b> G <b>S</b> R---N <b>P</b> Y <b>D</b> L <b>C</b> V <b>N</b> I <b>S</b> E <b>S</b> P <b>N</b> G <b>D</b> C <b>L</b> E <b>V</b> V <b>M</b> R <b>E</b> S <b>L</b> Y <b>S</b> A <b>D</b> A <b>A</b> E <b>S</b> V <b>L</b> G <b>S</b> Y <b>C</b>                                        |
| SYN8 (NRPS)    | (359) | D <b>A</b> L <b>A</b> V <b>P</b> R <b>S</b> T <b>T</b> H <b>S</b> ---P <b>L</b> F <b>Q</b> V <b>V</b> L <b>N</b> Y <b>R</b> L <b>D</b> A <b>L</b> A <b>H</b> S <b>A</b> V <b>G</b> ---D <b>G</b> R <b>L</b> E <b>F</b> V <b>K</b> A <b>R</b> N <b>S</b> R---N <b>P</b> Y <b>D</b> V <b>S</b> L <b>S</b> V <b>T</b> D <b>S</b> P <b>D</b> G <b>T</b> C <b>L</b> L <b>D</b> V <b>S</b> M <b>Q</b> E <b>S</b> L <b>Y</b> G <b>P</b> E <b>A</b> A <b>A</b> S <b>V</b> L <b>A</b> M <b>Y</b> R                                      |
| BbNRPS (4)     | (339) | D <b>E</b> L <b>Q</b> L <b>E</b> R <b>S</b> M <b>S</b> Y <b>S</b> ---P <b>L</b> F <b>Q</b> V <b>F</b> I <b>L</b> Q <b>N</b> I <b>P</b> Q <b>A</b> E <b>P</b> ---A <b>G</b> D <b>I</b> Q <b>L</b> S <b>S</b> F <b>D</b> L <b>E</b> L <b>G</b> ---A <b>V</b> T <b>S</b> K <b>F</b> D <b>M</b> T <b>V</b> T <b>M</b> V <b>E</b> T <b>P</b> --D <b>G</b> L <b>L</b> A <b>T</b> L <b>E</b> Y <b>N</b> K <b>A</b> L <b>F</b> D <b>S</b> S <b>T</b> I <b>T</b> R <b>M</b> V <b>E</b> H <b>F</b> H                                     |
| MxaA           | (340) | Q <b>T</b> V <b>G</b> A <b>S</b> R <b>D</b> G <b>G</b> L <b>N</b> ---P <b>L</b> V <b>R</b> A <b>C</b> F <b>T</b> L <b>E</b> S <b>I</b> P <b>A</b> P <b>T</b> L <b>D</b> ---L <b>P</b> G <b>T</b> S <b>W</b> S <b>F</b> L <b>N</b> G <b>A</b> P <b>D</b> G <b>S</b> V <b>E</b> G <b>V</b> A <b>K</b> F <b>E</b> L <b>S</b> L <b>I</b> L <b>A</b> A <b>S</b> E--K <b>G</b> L <b>A</b> G <b>M</b> L <b>E</b> Y <b>S</b> R <b>E</b> V <b>F</b> D <b>A</b> S <b>T</b> V <b>E</b> R <b>M</b> V <b>G</b> H <b>F</b> Q                 |
| AnACVS (2)     | (336) | S <b>R</b> G <b>N</b> V <b>E</b> L <b>G</b> R <b>L</b> Q <b>K</b> N <b>E</b> L <b>K</b> H <b>G</b> L <b>F</b> D <b>S</b> L <b>F</b> V <b>E</b> N <b>Y</b> P <b>I</b> L <b>D</b> K <b>S</b> ---E <b>E</b> M <b>R</b> Q <b>S</b> E <b>L</b> K <b>Y</b> T <b>I</b> E <b>G</b> N <b>I</b> E <b>K</b> L <b>D</b> Y <b>P</b> L <b>A</b> V <b>I</b> A <b>R</b> E <b>V</b> D <b>L</b> T <b>G</b> G <b>F</b> T <b>T</b> I <b>C</b> Y <b>A</b> R <b>E</b> L <b>F</b> D <b>E</b> I <b>V</b> I <b>S</b> E <b>L</b> L <b>Q</b> M <b>V</b> R |
| HCsynth (2)    | (358) | D <b>A</b> L <b>G</b> L <b>S</b> T <b>S</b> T <b>P</b> L <b>F</b> N-----T <b>A</b> F <b>T</b> Y <b>L</b> P <b>K</b> R <b>P</b> T <b>N</b> V <b>K</b> A <b>G</b> ---E <b>P</b> E <b>H</b> H <b>L</b> C <b>F</b> E <b>L</b> S <b>M</b> S <b>D</b> P <b>T</b> E <b>F</b> D <b>L</b> T <b>F</b> V <b>E</b> P <b>T</b> Q <b>E</b> S <b>N</b> E <b>V</b> S <b>A</b> H <b>L</b> D <b>F</b> K <b>L</b> S <b>Y</b> I <b>S</b> Q <b>A</b> Y <b>A</b> T <b>S</b> I <b>A</b> S <b>T</b> V                                                  |
| Syn6 (Cdom)    | (333) | E <b>S</b> L <b>G</b> V <b>D</b> A <b>A</b> R <b>P</b> H---E <b>F</b> L <b>Q</b> A <b>V</b> F <b>D</b> Y <b>K</b> Q <b>Q</b> A <b>E</b> S <b>G</b> S---I <b>G</b> Q <b>A</b> V <b>E</b> M <b>A</b> G <b>V</b> L <b>A</b> S <b>R</b> F <b>S</b> ---T <b>P</b> Y <b>D</b> V <b>L</b> E <b>M</b> R <b>D</b> D <b>P</b> S <b>K</b> T <b>P</b> L <b>L</b> T <b>L</b> K <b>L</b> Q <b>S</b> S <b>L</b> Y <b>S</b> L <b>Q</b> D <b>V</b> H <b>K</b> V <b>M</b> G <b>C</b> Y <b>M</b>                                                  |
| LNKS (Cdom)    | (340) | D <b>Q</b> L <b>G</b> L <b>E</b> V <b>P</b> V <b>P</b> T <b>S</b> N--Q <b>P</b> A <b>P</b> L <b>F</b> Q <b>A</b> V <b>F</b> D <b>Y</b> K <b>Q</b> Q <b>A</b> E <b>S</b> G <b>T</b> ---I <b>G</b> G <b>A</b> K <b>I</b> T <b>E</b> V <b>I</b> A <b>T</b> R <b>E</b> R-----T <b>P</b> Y <b>D</b> V <b>V</b> L <b>E</b> M <b>S</b> D <b>D</b> P <b>T</b> K <b>D</b> P <b>L</b> L <b>T</b> A <b>K</b> L <b>Q</b> S <b>S</b> R <b>Y</b> E <b>A</b> H <b>H</b> P <b>Q</b> A <b>F</b> L <b>E</b> S <b>Y</b> M                         |
| ChPKS17 (Cdom) | (327) | A <b>A</b> L <b>D</b> G <b>P</b> E <b>L</b> D <b>R</b> H <b>G</b> ---S <b>L</b> Y <b>Q</b> V <b>S</b> V <b>N</b> Y <b>M</b> P <b>S</b> P <b>V</b> R <b>D</b> I <b>S</b> ---L <b>G</b> G <b>H</b> T <b>A</b> E <b>I</b> L <b>K</b> Y <b>N</b> R <b>V</b> G <b>G</b> ---Y <b>A</b> C <b>D</b> L <b>D</b> L <b>E</b> L <b>Q</b> D <b>L</b> G <b>N</b> D <b>R</b> M <b>L</b> L <b>V</b> M <b>R</b> G <b>R</b> Q <b>D</b> L <b>Y</b> D <b>E</b> L <b>G</b> V <b>Q</b> T <b>L</b> L <b>T</b> I <b>Y</b> E                            |
| BfPKS3 (NRPS)  | (332) | S <b>G</b> S <b>Q</b> R <b>S</b> T <b>N</b> T <b>S</b> L <b>S</b> ---P <b>L</b> F <b>Q</b> V <b>V</b> L <b>N</b> Y <b>V</b> A <b>G</b> A <b>S</b> R <b>M</b> K <b>M</b> G---E <b>S</b> K <b>F</b> Q <b>Y</b> I <b>E</b> S <b>E</b> ---A <b>K</b> H <b>P</b> Q <b>D</b> L <b>V</b> F <b>T</b> I <b>R</b> E <b>I</b> D <b>G</b> V <b>T</b> H <b>L</b> S <b>L</b> A <b>S</b> H <b>E</b> Y <b>L</b> Y <b>S</b> K <b>E</b> D <b>T</b> K <b>A</b> L <b>L</b> E <b>L</b> Y <b>V</b>                                                   |
| BfPKS5 (NRPS)  | (344) | D <b>E</b> L <b>S</b> V <b>P</b> R <b>S</b> N <b>R</b> W <b>T</b> ---P <b>L</b> F <b>Q</b> V <b>F</b> I <b>D</b> Y <b>R</b> L <b>I</b> P <b>S</b> Q <b>G</b> A <b>K</b> Q <b>R</b> E <b>W</b> A <b>G</b> C <b>D</b> V <b>S</b> E <b>E</b> T <b>W</b> H <b>T</b> A <b>R</b> ---S <b>G</b> F <b>D</b> V <b>V</b> L <b>E</b> I <b>K</b> E <b>D</b> Q--N <b>E</b> T <b>T</b> L <b>K</b> F <b>H</b> Y <b>Q</b> D <b>L</b> Y <b>D</b> E <b>A</b> A <b>E</b> L <b>L</b> L <b>N</b> S <b>Y</b> I                                       |
| mg03818 (NRPS) | (333) | S <b>E</b> L <b>G</b> V <b>P</b> R <b>S</b> A <b>D</b> H <b>S</b> ---P <b>I</b> F <b>Q</b> A <b>F</b> V <b>D</b> Y <b>R</b> Q <b>G</b> A <b>K</b> E <b>Q</b> S---L <b>G</b> D <b>C</b> L <b>E</b> V <b>Y</b> H <b>Y</b> Q <b>A</b> K---T <b>A</b> Y <b>D</b> V <b>S</b> L <b>D</b> I <b>D</b> S <b>G</b> E <b>L</b> P <b>T</b> A <b>V</b> R <b>L</b> A <b>V</b> Q <b>D</b> S <b>L</b> S <b>R</b> E <b>D</b> G <b>K</b> L <b>L</b> L <b>G</b> A <b>F</b> V                                                                      |
| GmPKS10 (NRPS) | (324) | D <b>E</b> M <b>K</b> L <b>P</b> R <b>S</b> T <b>T</b> H <b>S</b> ---P <b>L</b> F <b>Q</b> V <b>V</b> M <b>N</b> Y <b>K</b> M <b>G</b> S <b>T</b> Q <b>K</b> V <b>P</b> ---L <b>A</b> D <b>C</b> Q <b>A</b> Q <b>L</b> V <b>A</b> F <b>E</b> D <b>A</b> N-----N <b>P</b> Y <b>D</b> L <b>T</b> F <b>D</b> I <b>E</b> T <b>Y</b> Y <b>D</b> G <b>S</b> A <b>S</b> I <b>S</b> V <b>K</b> T <b>Q</b> E <b>Y</b> L <b>S</b> E <b>S</b> E <b>L</b> S <b>F</b> V <b>L</b> D <b>N</b> Y <b>V</b>                                      |
| Consensus      | (401) | D <b>L</b> <b>V</b> <b>R</b> <b>S</b> <b>H</b> <b>S</b> <b>P</b> L <b>F</b> Q <b>V</b> V <b>Y</b> <b>R</b> <b>G</b> <b>S</b> <b>L</b> <b>G</b> <b>L</b> <b>L</b> <b>Y</b> <b>D</b> L <b>I</b> <b>E</b> <b>G</b> <b>L</b> L <b>L</b> <b>L</b> <b>Q</b> <b>L</b> <b>Y</b> <b>L</b> L <b>Y</b> V                                                                                                                                                                                                                                  |

# A1

|                |       |                                                                                                          |     |
|----------------|-------|----------------------------------------------------------------------------------------------------------|-----|
|                | 501   |                                                                                                          | 600 |
| Ace1 (NRPS)    | (419) | RLVDSFAKN-PATSLNRPATIDPVAVDKALTLGCGPTLEDSSWPETLIHRIENMSVKYATKFAALRNGQNGG-----LTYSQMIARINDIAAKLI----      |     |
| GmPKS9 (NRPS)  | (423) | NLLRKVTADEAGSKTALKSLPPWQTQNDLSVSLGPTIDAWPN--SDTLSHRIDAMIRENPSAQALDDETS-Q-----FSYEQMGRRIDEIAASLTS---      |     |
| GmPKS1 (NRPS)  | (425) | SVLEYMVQG-TNKAADTPPAWSKDDIQVALDAGKAPFELPK-WQPTISHHIDIQIQTNTTKVALKDGNG-A-----VLTYEQMGKRINSIAQALI---       |     |
| SYN2 (NRPS)    | (424) | ELVKSITQN-PATRLKAATIFNSSQVDASTQLGRGIYQKPKQ-WPATLVHRIDDMAKRYPDNIAVKDGRGDR-----ITYREMSQKIDCISHALSS---      |     |
| mg03810 (NRPS) | (433) | TLLDSFSQANSKTAVGDARMVTADQAEAAALRLGRGQ--ILHLKHQSILPSLDLAAQSLQDTPVALGDMKSS-----LSWADMTRKSIALCRELRR---      |     |
| AF04917 (NRPS) | (425) | NVLQVLAEN-PERLVGSVTSINATLEDEGVKLGTPILDVAPSTPTLSKIFHTVWDKDPHALAVKDDTTGK-----SKTYVQLAERANAIAASLL---        |     |
| AN8412 (NRPS)  | (420) | DVLRASSDN-PSLPVNQLPVTLPESTGKALAVAKGPRAEYS-WPNTLWERYDAIRKSFPEETAIKDGKS-----ELSYSQLTRSVKLAAMLI---          |     |
| mg09589 (NRPS) | (441) | RLEEMASQSQHMTIDNLEISDSLSAPRPSIPATLQDATEHPVWASTISRQIDNAADEYRDAPASDGDQT-----LTYCELMRKVDNICELLLKT-K         |     |
| SYN8 (NRPS)    | (445) | ALMASVCRDQVKVGDLISSLGAASLPTTMLTMTGAKSGDTPVSEMSDESLTIWHKIKQASLQVGDSTAIHGEHSPTLSYNDLTGMSSSMATSLQRLCA       |     |
| BbNRPS (4)     | (426) | KLMEEIVAN-PDQSIITLLPLMREEEQQLLITEWNRTEVPYSREKCVHEMIEEMVSKAPDSIALIVGEQR-----VTYGELNRQANQLAHYLR---         |     |
| MxaA           | (430) | VLEESIVAH-PEVPLSKLPLLTAEERGRLLNDWNGPVLVDP-ALCMHELVAQAERTPQAVAVVSGQKT-----LTYAELNRRANQLAHHLR---           |     |
| AnACVS (2)     | (432) | DTLLQVAKHLDDPVRSLLEYLSSAQMAQLDANWATDAEFPDT---TLHAMFEKEAAQKPKVAVVVEQRS-----LTYRQLNERANRMAHQKSDIS          |     |
| HCsynth (2)    | (444) | AHILSELVHDPYRALNLTLPVSEHDTAIRSWNDHLFPAT---ECIHETFSRKYVEHPQREAI CSWDG-----SLTYAELSDLSQRLSIHLVS---         |     |
| Syn6 (Cdom)    | (418) | SLLDGF SRD-QGILVGEAELL C-----                                                                            |     |
| LNKS (Cdom)    | (430) | SLLSMFSMN-PALKLA-----                                                                                    |     |
| ChPKS17 (Cdom) | (414) | CVLSTLVED-TARSI SEVNV PSTAEIELSLSKYQIKTNI PRFTN-----                                                     |     |
| BfPKS3 (NRPS)  | (417) | DLETLSSS-PGKEISQYPMTTTTDN-RALALGLGNSITTR-WPSTLSQKVAEITSENPNHLSLKDQLGSQ-----MTYAELKRVNTIASV LIN---        |     |
| BfPKS5 (NRPS)  | (433) | NVLRQVTEQGVRTDLTKLNKWDKDVQKALTI SRGP-TMKQEWPA TVAHQIAQVIQRHPNAPAL KDGYGAN-----LTYAAMNQRVEGIVSVLRAQLT     |     |
| mg03818 (NRPS) | (419) | HLVKLLAAT-ATTEEGHRVSIENLPIFPADVVQDAVQLGR-----G---PSKDP TWP GTLL-----DRVAE VWSQALAVAAGTIS---              |     |
| GmPKS10 (NRPS) | (410) | EKLDLFTSE-PSQTV DQICKPTAEQIGKALTLGRGERIPSP-RL ETL SHYFEKCVVNQ PDDVAVLVTDKGQA-----L TWSQLKALVNQIAMALV---- |     |
| Consensus      | (501) | LL LS P L L AL LG G TL ID AL LTY EL R IA L                                                               |     |

# A2

|                |       |                                                                                                               |     |
|----------------|-------|---------------------------------------------------------------------------------------------------------------|-----|
|                | 601   |                                                                                                               | 700 |
| Ace1 (NRPS)    | (507) | -DAKVG TG-IVGVMQASTMDFICISLAVWKAGAIYTPLDPRLNSTDRLLKAVVDECQPACILVDATTKPLFDSLATNAVQIDVSMVQSSKTLEAS-----         |     |
| GmPKS9 (NRPS)  | (510) | --AGLSENFVGVFQETGVDWICSM LAILKLGMTYVPLYPPIG-MPRLAANVQVAQPQAVLVDDSTADKFDRLGTQSAQMIHVPIAGSSTA EVP-----          |     |
| GmPKS1 (NRPS)  | (512) | -DAGTTQGT VGVFQEPSSDWICSL LAIFKAGAVVPLDLRNS-IPRLTRIVKASRPSLIITDHTTDDKVELI GAKFITQLRLYKVVDQEFREP-----          |     |
| SYN2 (NRPS)    | (512) | -DSSCRVKSTVGVLLDPSDWICSL LAI LRLGATYVPLDIVTG-WDR LSSVVRD SKPDL L LVN NRLESQTKNLGDAMATARFVNIENLAPATNQ-----     |     |
| mg03810 (NRPS) | (521) | --LGVSPGARVGMFQEP T VDWVVTMLGVWRAGASYVPLDLAQQ-LPRLARIKASKLAAALVVHSETAALVARLGRDPNDG VVDISTLHHFPLLG-----        |     |
| AF04917 (NRPS) | (514) | -NAGAAPSIPIGVLLDPGVDTIATILAILRIGAAVYVPLDRSS-DAVLS DILQESQPGIVIHHSATAPRSQIALLKASAKTKLVTLN AVPQKTIR-----        |     |
| AN8412 (NRPS)  | (506) | -SQGVTAGDSVGVLLHPSIDAIA CMLALLRVGCYTPLDTRLP-VARLSIIVNRSKSSLVLYHASTHDVALELGKFSKLANVEDMCESGQAQVP-----           |     |
| mg09589 (NRPS) | (532) | -TASEDDNFVCVLLFEP SADYIAAL LAVLRVAGVAVPIDPRNH-KERMAVMVGDCKPTVILHHSQTAEVASWLSKSSSDSKLELVDTSLATSAPR-----        |     |
| SYN8 (NRPS)    | (545) | SRGVETRGAF CALLEPSADYVAAL LA VFKLRAVAFPM DTTNH-KQRLAVMAKDCRPSILLYHNR TKDLAAWLKTCNQDQCIADV AELISSATNTYDS       |     |
| BbNRPS (4)     | (512) | -KQVGPEVLVGI CAERTVEMMIGLLAILKAGGAYVPI DPAYP-AERLAIYIIGHSQIPVLLTQEHLLPTLPEHQAKVICLDRDWATVAVESE-----           |     |
| MxaA           | (515) | -RLGIQKEERVGLCVERTEDIVIGLLAILKAGGAYVPLDPAYP-KERLALILEDAQVPVLLTQQRVLPELPATQARVVCLDKDWPTIGAESD-----             |     |
| AnACVS (2)     | (520) | ---PKPNSRIALVVDKSEHMIATILAVWK TGGAYVPI DPEYP-DDRIRYILEDTSAIAV ISDACYLSRIQELAGESVRLYRSDISTQTDGNWS-----         |     |
| HCsynth (2)    | (530) | --LGIKVGTKIPICFEKSMWTVTILAVVQAGGVFVLL EPGHP-ESRLSGI IKVQAE L L L CSPATSRMGALQNI STQMGTEFKIVELEPEFIRSLPLP----- |     |
| Syn6 (Cdom)    | (439) | -----                                                                                                         |     |
| LNKS (Cdom)    | (445) | -----                                                                                                         |     |
| ChPKS17 (Cdom) | (457) | -----                                                                                                         |     |
| BfPKS3 (NRPS)  | (504) | --AGAIGGTLIGVLS SRTDVVGTVLAIWKIGGIYLP LVVSHG-AERL SNVTSNCCPEILVCPDSVNLELAHQ LNSRHVVDLTEVHNPQNVFTIS-----       |     |
| BfPKS5 (NRPS)  | (525) | -ATTQEDQIVGVFQTPSADFVCSLLAIHRVGA VPLPLDRNG-MSRLASAVKAAQHIAI L TDKEFVHTQTNELDLAQGT VILNVADIKSNPVAN-----        |     |
| mg03818 (NRPS) | (490) | -QLGTAAGSIIIGV LQEPGADWIVSLLAIWRVGCYMPF DAATP-MSRLA INCAHASPQIVLVDEAFVTTASTLEKPLLNVSSIPRANKPPGPRTT-----       |     |
| GmPKS10 (NRPS) | (497) | -EAGAKQDSQVGVYCDPSMYILP TLLAI AEIGGVVYVPLDTQNP- IKRLQLMVDDCQADVLLIDDS TATLSLELETKAKMINVNTIKAGPSNTFHL-----     |     |
| Consensus      | (601) | G VGV EPS D I SLLAI KVGAVVPLD RLA IV S LLL T L I                                                              |     |



A5

A6

1000

Ace1 (NRPS) (761) PTEATINANTRIVPYHEPN---S--N-PDLPLLTWPNYSISIVDLEL-NPVPVGVFGEVCIGGAGVGLGYFK-NDELTAKAFVADKTAPAEFVAKGW--K  
GmPKS9 (NRPS) (762) PTETTITNRIELNFADYAEGDKAMRYVTDVGFPCANYSTYIVDENMS-LVPRGYPGEIVVGGAGVADGYLG-RPDLTKEKFIQDPWTS---SKEW--K  
GmPKS1 (NRPS) (763) PAETTILSHRIDLKYTDPH---LP--DPLPAGYPMGPFVVCVVDEKM-RPVPLGVQGEIILGGPCIVSGYLN-MPDSTKDKFLP-----DTFFGTS--G  
SYN2 (NRPS) (767) PTEITFCAMRAVDYRSDA---P-PDAEAGGFKPWPNVSVYILDADQ-KIVPAGVTGEIAIGGGVVAGYG--DHKLSAAAFKHDKWASSEFVQSGW--T  
mg03810 (NRPS) (781) PSETWMLPSHEIPLGQARTMEDVERLWPVPIGSTMPNYAVRVEDVNG-HVLPMPGQVIVIGGCGVALGVVSSEPTVTDPRFLPDSHPAEVHLARGWD--  
AF04917 (NRPS) (764) PTEASICSSSLGEVSNFRIS---S-SETSIPIGKATPNYGTIYVDQHC-KPVPLGWPGVEVAIAGPGVASGYLN-LGELTQAKFR---SAATLGEVFGS--D  
AN8412 (NRPS) (756) PTEITAAATFQDISLQMKD---QSTTDGSLVGKALPNYSYVIMDASSGSPVPIGVTEICIGGAGVSLGYLN-SLEQTDAKFVRDPPFASPEDITRGW--T  
mg09589 (NRPS) (803) PTETCMISNIGRIEYWGNHRDEE--SRSPWVPPFANARVYILDQAG-RTVPSGSSGEIYIAGEGVGLGYLG-RADLTRASFVADTFGP-----GN--T  
SYN8 (NRPS) (827) PTETCMSSNVGRIEYWL DEN-VQEPARVFAVGPPLDGVIRVLDG-NEVPYGAEGEYIIGGVGVGPGYLN-RPDLTDAAFLEPEPTNDPPAAAGSGRSK  
BbNRPS (4) (754) PTEDTVYSTHAIIVTKGATN-----EPLIGRPQFNTHVFLVDSHR-KPVVGVPGELYLSGSLARGYLH-RPDLTAERFV-----QNPFPREPQ---A  
MxaA (757) PSETTYSTFTRVNRGQ-----TPTIGRPVGNTOVYALDSNR-EPMPIGVPGEYIIGGMGVARGYLH-RPELTAERFV-----RSPFGGSE--A  
AnACVS (2) (767) PTEISITTHKRLYPFPERR-----TDKSIQQIIGNSTSYVLNADMKR-VPIGAVGELYLGGEGVARGYHN-RPEVTAERFLRNPFQTDSEQRQGRN-S  
HCsynth (2) (782) PTEATVACIANQVTCITTTT-----VSDIGRGRATTVWVQPDNHNLSLVPVIGAVGELIIEGSLCRGYLN-DPERTAERFVIRSPSWLHDLRPNL----  
Syn6 (Cdom) (439) -----  
LNKS (Cdom) (445) -----  
ChPKS17 (Cdom) (457) -----  
BfPKS3 (NRPS) (751) PTECSISCAIHQVPYLEYEDG--MEWTLVSLVGTVLPGYEVYILDDEKL-QPTRIGWPGEIIFIGGPGVGSYVNV-DKEKTNASFLNPFKQSE---TTG--T  
BfPKS5 (NRPS) (781) PTEGTISAMKGLIEIDP-----AVAVPVPGFVLPNYAAYIVDXXX-----XX-----  
mg03818 (NRPS) (744) PTETTCSATRTELDRYGPW---G--DRPTTSGRAAPNCSVICVDANL-APLPVGMPEGVILGGAKVALGYLG-SCELTATRFIAPHASIHEDFAARGW---T  
GmPKS10 (NRPS) (748) PTEITIIATCGSNELGDTL---R-DTHNPSIIRALPNYSYILDENMQ-VVRPLAGELVIGGAGVAIGYLN-RQDLTEAKFLSDPPAPPEDVARGW---T  
Consensus (901) PTE T I S V IG LPN VYILD VPIG GEI IGG GVA GYL ELT KFL G

A7

A8

1100

Ace1 (NRPS) (851) TKFRITGDLGRISP DG-GLIIEGRIDGDTQVQLRGMRIDLKNIESAILQAGAKIIDAASVRRG-----GAD---ESEPQYLVGHVVLDALDA  
GmPKS9 (NRPS) (854) IMYRTGDRGKLRANG-MVDILGRIEGGTQVQLRGYRIELDDVESAILSAAQGVLSDAVVTLYRYPEER-----HED---HYDDGFLVAHVVAD  
GmPKS1 (NRPS) (848) KVVYRSGDRGRICQDG-LLFCDGRLEGSNMIKLRGFRVLEDEVEKTIISHSAGALSHAVVTLRGTE-----EGRYLATHVVVFA  
SYN2 (NRPS) (858) RLHLTGADVGIIDPIDGTLKLGRIAGDTQIKLRGMRLDVREVELAIMKTAQGGINDVVVTAHNN-----KATGASSLI AF  
mg03810 (NRPS) (878) KVHPSGDYGYMTEEGL-LFVSLGRISGDTQIKLRGMRLDLRHVEAAMMDMEMAQGFVVVDVVVGVVSTDGQ-----PLAAGSLADDSTSKVLVAHVAVTD  
AF04917 (NRPS) (853) CLYLTGDRGRMLS DG-SIVLSGRVGDGDDQVIRGHRVQLGDVARALVQASRGVFADAAVILKGDGDT-----NPQLVAVVVF  
AN8412 (NRPS) (850) KMYRTGDMGCLTEDG-TLIFMGRMDGDNQVQLNGLRIELDEIANSILTTGNDLVSEAVVTVHSG-----SGSGSPLLVAHV  
mg09589 (NRPS) (891) KMYRTGDSGFLDPDG-SLVILGRIQDDSQVIRGIRIELDEVSSVIVRSSGGRVSAITTVRGTGEN-----KMMVSFAVLNEGS  
SYN8 (NRPS) (924) KMYRTGDKGYWLPDG-SLMVCGRIDGDTQVQMHHGRIELLEDVASAILAAGLVSHAVATVR-SD-----EHDKTIVAFVVVPS  
BbNRPS (4) (836) RMYRTGDLVRYLPDG-NLQFVGRVDYQVKIRG-----YRIELGEIESVLNRFPGVKE-----VVLL---AREDRGDKCLVAYI  
MxaA (838) RLYRTGDLARWLPDG-QL EYLGRMDHQVKLRG-----FRIELGEIGAVLMEHSGIRD-----AVVV---VREGLGADKQLVAVV  
AnACVS (2) (857) RLYRTGDLVRWIPGS-NGEIEYLGRNDFQVIRGLRIELGEIEAVMSSHPDIKQSVVIKSGKEG-----DQKFLVVG  
HCsynth (2) (869) TLYKTGDLVRYSDG---KIFIFIGRKTQVQMNQGRFELGEVEHALQLQDPSDGPIIVDILKRTQSGEPDLLIAFLVGRANTGTGNSDEIFIATSTSS  
Syn6 (Cdom) (439) -----  
LNKS (Cdom) (445) -----  
ChPKS17 (Cdom) (457) -----  
BfPKS3 (NRPS) (842) TLYRTSDLGRILHDG-TISIIIGRATGDRQVQLRGMRIELDEISHTILSCSNGIVKEAVVVKKSG-----TDPFLVSFVVL D  
BfPKS5 (NRPS) (824) -----  
mg03818 (NRPS) (835) SVHRTGADVGRLLPDG-ALVILQGRVGDGTRVQLRGNRVDLVVDEEAMLQAGQQLLQVFAFLYCPDLASD-----DGAL---AHPESAVLAALVVVD  
GmPKS10 (NRPS) (840) RMYRTGDKARFLSDG-RLCFLGRVAGDSQIKLRGFRIELQDIASITVSKASDGKVP EAAVSLRGE-----GDSAYLVAFVILS  
Consensus (1001) KLYRTGD GRL DG L I GRI GD QVQLRG RIEL EV IL G L V L VV

**A9**

**A10**

1101 1200

Ace1 (NRPS) (932) DQTPEDSQDFLAQLIPRLRLPRHMKPSLLVPIRA-LPQTASHKLDRRALQQLPISDAGQIAKQS-----QQGAELGSDQARM

GmPKS9 (NRPS) (938) KSLRRPEVESFLRKIVSKLPLPHYMLPALMLPIDR-FPLTAHQKPDNRATAALPLPAFTLATAN-----DAIAEEGSLESET

GmPKS1 (NRPS) (924) PEVAEHNQEGIMKALRQTLPLPPYMRPSVFQVLSLSD-IPRTAHLKIDRKAIQEMPVQIS-----ASHDSGILTV

SYN2 (NRPS) (933) AIVADPKASHDFSRVRLARLPLPQYMRPAATFPIDN-FPTNASGKVDRIATRNLDLPQTQDFDRKS-----AANSDAHLTDTES

mg03810 (NRPS) (969) ASTATDTTDERLRSIAENLPLPDYMRPAVVVPVDS-IPLTTPNGKQDRAALALWPVQLGSMKVHESNAAEWESS-SP-----QAAHVSNGDKQPLELMS

AF04917 (NRPS) (930) RTSNIQDQQTYLRLQNLQDLVPAYMRPAITIPLDLTPVTDGRKLDKSKLASLPLPSIS-----VDYEEDQLTPTE

AN8412 (NRPS) (925) VPLGDNVDNSRLQQLARDLPLPQYMLPSVVSLDR-LPITNANGKVDRAALMALPLPTQRTESAAG-----TGTDTARHLSLAE

mg09589 (NRPS) (970) KEDRKSDAAFLAALASSLPLPSYMPAAITLPLQK-FPTTASGKLDRAALDRIQLPPTAPTPTKTSNT-----GDSKLLMEMENELL

SYN8 (NRPS) (1000) PRLSPADAPKFLAELPARLPLAEYMRPAAILPLET-LPLNASGKLDMAALAEVPLPEQQHHEALQPAPDLAAATSVAGTHTKIHETPPSTDLSYLEQELL

BbNRPS (4) (906) VFEADCTSKIHDLNHFLADKLPAYMIPQHYMILDS-LPKTPNGKLDRAALPKPEYDRS-----EAGVEYVAPQTP

MxaA (908) VGRGEKAPEAELRDYKSKLPEYMPFLFVGLDA-LPLTPNGKVDRAALPAPERTHS-----GPAKEHVAPRTP

AnACVS (2) (928) YFVASSPLSPGAIRRFMQSRLPGYMPSSFIPISS-LPVTSPGKLDTKALPTAEKGMN-----VLAPRNE

HCsynth (2) (966) LSEFSTVIKKLQDAQRAEVLPLEFVMPQAYIPIEGGIPITAGKIDRRMLRKLCEPFNRNDLISFTS-----KALSTSVKDAETT

Syn6 (Cdom) (439) -----

LNKS (Cdom) (445) -----

ChPKS17 (Cdom) (457) -----

BfPKS3 (NRPS) (917) PNRMPIDTPGYLRDLNSLPLPPHMRPAVCVSIK-IPLLASCKVDYKQLQVMPISQGVRLDK-----GELNPIE

BfPKS5 (NRPS) (824) -----XX-----LTLCLPLYMCPSITVVLEE-MPLTAHSKVDRRAVQVLSPELAES-----DSDAIIAPDLTW

mg03818 (NRPS) (922) PCHPSADREELFADLLKRVSLPRAQKPTVVKAVES-LPTTVSGKVDRAAKLPLKLVGSPPAVL-----GGEQDKELSETES

GmPKS10 (NRPS) (916) QFNRPDSDEKGYLKLQLEELSIPRYMKPAKIIISISQ-LPMNASGKLDQYALDALPVSYEK-----DIVDKPLTE

Consensus (1101) L L L LP YM PA IV LD LPLTA GKLDL AL L L

**T (PCP)**

1201 1275

Ace1 (NRPS) (1009) --WKLWKQVTPRDVVSQYSITPQSDFFHVGGTSLLLVNLQSLIAREHGRAPPLHAMFESSTVAAMTDLVLSLSD---

GmPKS9 (NRPS) (1014) QKKIAKMWRTLVPASASATITADTDFFHVGGSSLLLIKLGMIKKEFNVSRLRLNLMAASKLREMAALVND----

GmPKS1 (NRPS) (991) AEKALSELWRRVLPDPGSLTPESDFFLIGGNSILLVKLQALLRQTFKTA PKLVTLMGASTLGAMAVVL-----

SYN2 (NRPS) (1010) RLAQLWTQVITKGVISQYQITNESNFFHVGGTSLLVQLRSALIEASFGTRPTLFLQFEAGTLAAMAALIAPL---

mg03810 (NRPS) (1060) RIWREALGLSPTGSEQPGMEPDDDFFMGGNSILLTRVQRSIRLEHGVLDLPLRELPHNTTLAQMSQLLLDQD---

AF04917 (NRPS) (1001) ARLRDVWKNVLDGIASSIPIRRSDFFSVGGNSLLLALKAELAQVFGVGLSVSELFQASTLELLAARL-----

AN8412 (NRPS) (1002) GELRLLWEKVLPAASGGPSRLDADSDFFMRGGTSMMLVRLQGAIKESIGVSIQVAELVQFPTLQOMARRISRR---

mg09589 (NRPS) (1049) CIWMDLLPDLPNQGVLSPGYTPDIDFFRIGGNSITLVALRNAIRRRWGINVPLLKLFEATTLRSMTALITKS---

SYN8 (NRPS) (1099) STWTAVLPSELGKQLLKNTSAHRLDFFRVGGSSITLVVLRDAIRRRFRAHVPLPLPFENS TLGSMMAAVVGRQ---

BbNRPS (4) (975) --VEIMLHAHWAAVLEMETIGVHDFEFGGHSLLATQLIFKVRRELQLEVPLRILFETPTIAGMAKTIEEI---

MxaA (977) --GEESLAAITWRQVLGVEQIGAHDNFFELGGHSLLLYRVLVLRASASGADIPLRALLQAPTLEEMARAVEAA---

AnACVS (2) (994) IESILCGIWAGLLDISAQTIGSDSDFFTLGGDSLKSTKLSFKIHEVFGRTISVSALFRHRTIESLAHLIMNN---

HCsynth (2) (1046) DTVEDRLARITWEKVLGVKGVGRESDFFSGGNSMAAIALRAEAQRS-GFTLFWADIFTNPRLADMAKLF SHGQ---

Syn6 (Cdom) (439) -----

LNKS (Cdom) (445) -----

ChPKS17 (Cdom) (457) -----

BfPKS3 (NRPS) (987) KKMAEIRKVLPLPSTSEDFVIGKSTDLFAIGGNSILLLRIQSEIKERSGIKIPLYKLFQSTMLADMSLQVMVGG---

BfPKS5 (NRPS) (882) TERRLAIIWATLLPPQSLLITQSSFFLAGGNSLLLVQLQAATI VEFGGAPRLSKLMAATTLASMAAEL-----

mg03818 (NRPS) (999) --QLREIWLQTLPAAGCYAQRGSSDFFHSGGDSLLLVALQRKIKQAFGIHVPLVDMFDSS TLKEMSLLIE----

GmPKS10 (NRPS) (983) TQERLKLGLKALPFVDAALGPDIDFFSAGGNSLRIVSLREYITREFGVTVSVFDLQASTLGEAAKIDGFTTQ---

Consensus (1201) L I I S DFF VGG SLLV L IR FG V L LF ASTLA MA LI
